1  
2  
3  
4  
5  
6  
7  
8  
9  
10  
11  
12  
13  
14  
15  
16  
17  
18  
19  
20  
21  
22  
23

## Maternally-regulated gastrulation as a source of variation contributing to cavefish forebrain evolution

Jorge Torres-Paz<sup>\*#</sup>, Julien Leclercq<sup>\*</sup> and Sylvie Rétaux<sup>#</sup>

Paris-Saclay Institute of Neuroscience, CNRS UMR9197, Université Paris-Sud and Université Paris-Saclay, Gif-sur-Yvette, France.

<sup>\*</sup> Equal contribution

<sup>#</sup> Authors for correspondence: [retaux@inaf.cnrs-gif.fr](mailto:retaux@inaf.cnrs-gif.fr), [jorge.torres-paz@cnrs.fr](mailto:jorge.torres-paz@cnrs.fr)

Key words: *Astyanax mexicanus*, developmental evolution, heterochrony, *dkk1b*, Wnt signaling, prechordal plate, notochord, maternal transcriptome

24 **Abstract**

25 Sequential developmental events, starting from the moment of fertilization, are crucial for the acquisition  
26 of animal body plan. Subtle modifications in such early events are likely to have a major impact in later  
27 morphogenesis, bringing along morphological diversification. Here, comparing the blind cave and the  
28 surface morphotypes of *Astyanax mexicanus* fish, we found heterochronies during gastrulation, producing  
29 organizer and axial mesoderm tissues with different properties, including differences in expression of  
30 *dkk1b*, that may have contributed to cavefish brain evolution. These variations observed during  
31 gastrulation depend fully on maternal factors, whereas later phenotypic differences in neural  
32 development became progressively hidden when zygotic genes take the control over development.  
33 Transcriptomic analysis of fertilized eggs from both morphotypes and reciprocal F1 hybrids showed a  
34 strong and specific maternal signature. Our work strongly suggests that maternal effect genes and  
35 developmental heterochronies occurring during gastrulation have impacted morphological brain change  
36 during cavefish evolution.

## 37 **Introduction**

38 Gastrulation is a fundamental process in organism development, leading to the establishment of the  
39 embryonic germ layers (endoderm, mesoderm and ectoderm) and the basic organization of the body plan.  
40 Although in vertebrates early embryonic development has adopted highly diverse configurations,  
41 gastrulation proceeds through evolutionary conserved morphogenetic movements, including the  
42 spreading of blastoderm cells (epiboly), the internalization of mesoderm and endoderm, convergent  
43 movements towards the prospective dorsal side and extension along the antero-posterior axis  
44 (convergence and extension, respectively) (Solnica-Krezel, 2005). Internalization of mesendodermal cells  
45 takes place through the blastopore, structurally circumferential in anamniotes (fishes and amphibians) and  
46 lineal in avian and mammalian amniotes (primitive streak).

47 A critical step for gastrulation to proceed is the establishment of the embryonic organizer (Spemann-  
48 Mangold organizer in frogs, shield in fishes, Hensen's node in birds and node in mammals), a signaling  
49 center essential to instruct the formation of the body axis. In fishes and amphibians the induction of the  
50 embryonic organizer in the prospective dorsal side occurs downstream to earlier developmental events,  
51 driven by maternal determinants deposited in the oocyte during maturation in the ovaries (Kelly et al.,  
52 2000; Nojima et al., 2004; Zhang et al., 1998). From the organizer will emerge the axial mesoderm, a  
53 structure that spans the complete rostro-caudal extent of the embryo, with the prechordal plate anteriorly  
54 and the notochord posteriorly. The axial mesoderm is the signaling center that will induce vertically the  
55 neural plate/tube in the overlying ectoderm.

56 The prechordal plate is key for the patterning of the forebrain, through the regulated secretion of  
57 morphogens including sonic hedgehog (shh), Fibroblast growth factors (fgf), and inhibitors of the Wntless-  
58 Int (Wnt) pathway like dickkopf1b (dkk1b) and secreted frizzled-related proteins (sFRP). Along its rostral  
59 migration, the prechordal plate is required for sequential patterning of forebrain elements (García-Calero  
60 et al., 2008; Puellas & Rubenstein, 2015), demonstrating a temporal and spatial requirement of this  
61 migratory cell population for brain development from gastrulation onwards.

62 Within the central nervous system, the forebrain plays a key role in processing sensory information coming  
63 from the environment and controlling higher cognitive functions. During evolution and across species,  
64 different forebrain modules have experienced impressive morphological modifications according to  
65 ecological needs, however the basic *Bauplan* to build the forebrain has been conserved. Temporal  
66 (heterochronic) and spatial (heterotopic) variation in the expression of regionalization genes and

67 morphogens during embryogenesis have sculpted brain shapes along phylogeny (Bielen et al., Houart,  
68 2017; Rétaux et al., 2013).

69 An emergent model organism to study the impact of early embryogenesis on brain evolution at the  
70 microevolutionary scale is the characid fish *Astyanax mexicanus*. This species exists in two different eco-  
71 morphotypes distributed in Central and North America: a “wild type” river-dwelling fish (surface fish) and  
72 several geographically-isolated troglomorphic populations (cavefish), living in total and permanent  
73 darkness (Mitchell et al., 1977; Elliott, 2018). Fish from the cave morphotype can be easily identified  
74 because they lack eyes and pigmentation. As a result of the absence of visual information the cavefish has  
75 evolved mechanisms of sensory compensation, as enhanced chemosensory and mechanosensory  
76 sensibilities (Hinaux et al., 2016; Yoshizawa et al, 2010). Sensory and other behavioral adaptations may  
77 have allowed them to increase the chances of finding food and mates in caves. Such behavioral changes  
78 are associated with morphological modifications such as larger olfactory sensory organs (Blin et al., 2018;  
79 Hinaux et al., 2016), increased number of facial mechanosensory neuromasts (Yoshizawa et al., 2014) and  
80 taste buds (Varatharasan et al., 2009), and modified serotonergic and orexinergic neurotransmission  
81 systems (Alié et al., 2018; Elipot et al., 2014; Jaggard et al., 2018). Remarkably, such morphological and  
82 behavioral adaptations have a developmental origin, mainly due to heterotopic and heterochronic  
83 differences in the expression of signaling molecules from midline organizers at the end of gastrulation, at  
84 the “neural plate” or bud stage. Subtle differences in *shh* and *fgf8* expression domains, larger and earlier  
85 respectively in cavefish compared to surface fish, affect downstream processes of gene expression,  
86 morphogenetic movements during neurulation and cell differentiation, driving the developmental  
87 evolution of cavefish nervous system (Hinaux et al., 2016; Menuet et al., 2007; Pottin et al., 2011; Ren et  
88 al., 2018; Yamamoto et al, 2004). As these differences in genes expressed in the midline are already  
89 manifest in embryos at the end of body axis formation, we postulated that they should stem from earlier  
90 developmental events during axis formation and gastrulation.

91 In order to search for variations in precocious ontogenetic programs leading to phenotypic evolution  
92 observed in *A. mexicanus* morphotypes, here we performed a systematic comparison of the gastrulation  
93 process in cave and surface embryos. We found that in the cavefish, migration of different mesodermal  
94 cell populations is more precocious, prompting us to go further backwards in embryogenesis and to  
95 investigate maternal components. Taking advantage of the inter-fertility of the two morphotypes we  
96 compared gastrulation, forebrain phenotypes and maternal transcriptomes in embryos obtained from  
97 reciprocal crosses between cavefish/surface fish males/females. We found that maternal factors present

98 in the egg contribute greatly to the evolution of cavefish gastrulation and subsequent forebrain  
99 developmental evolution.

100

101

## 102 **Results**

### 103 ***Molecular identity of the gastrula margin in A. mexicanus.***

104 In the zebrafish the embryonic organizer/shield becomes morphologically evident at the prospective  
105 dorsal margin of the blastopore right after the epiboly has covered half of the yolk cell (50% epiboly), a  
106 stage that coincides with the initiation of the internalization of mesendodermal precursors. We studied  
107 the expression of genes involved in the establishment of the organizer in the two *A. mexicanus*  
108 morphotypes at the equivalent stage by ISH, in order to search for early differences.

109 First, at 50% epiboly, the inhibitor of the Wnt signaling pathway, *Dkk1b*, was expressed in a strikingly  
110 different pattern in the two morphs. In the surface fish, *dkk1b* expression was observed at the dorsal  
111 margin in two groups of cells separated by a gap in the center (**Figure 1A**), a pattern observed in the  
112 majority of the embryos (around 70%; **Figure 1C** blue). In the cavefish, a single central spot of variable  
113 extension (**Figure 1B**) was observed in most of the samples analyzed (around 70%; **Figure 1C** red). A  
114 minority of embryos of each morphotype showed an intermediate pattern corresponding to a line of  
115 positive cells without a clear interruption (not shown, **Figure 1C** green). To interpret this *dkk1b* pattern  
116 difference between the two morphs, fluorescent ISH and confocal imaging was performed. In cavefish at  
117 50% epiboly, the *dkk1b*<sup>+</sup> cells were already internalized under the dorsal aspect of the margin (**Figure 1D-**  
118 **D'' and 1E, E'**), revealing a precocious internalization process as compared to surface fish.

119 Chordin is a dorsalizing factor, inhibitor of the Bmp pathway. In *A. mexicanus* it is expressed broadly in the  
120 dorsal side (**Figure 1F, G**), similarly to the pattern in zebrafish embryos (Langdon & Mullins, 2011; Miller-  
121 Bertoglio et al., 1997). In surface fish embryos *chordin* expression extended more ventrally than in cavefish  
122 (**Figure 1F-H**), as quantified by measuring the angle of expression in an animal view (**Figure 1 - figure**  
123 **supplement 1**). From a dorsal view *chordin* showed a slightly larger extension in the vegetal to animal axis,  
124 although not significant (not shown). This difference in *chordin* pattern extension suggested that  
125 convergence towards the dorsal pole was more advanced in cavefish.

126 Lefty1 is part of a feedback loop regulating nodal signaling activity, involved in axial mesoderm formation  
127 and lateral asymmetry establishment (Bisgrove et al., 1999; Meno et al., 1998). In *A. mexicanus* embryos  
128 *lefty1* expression was observed in the dorsal margin at 50% epiboly (**Figure 1 - figure supplement 2A-B**).  
129 The ventro-dorsal extension of *lefty1* expression was similarly variable in both morphotypes at this stage  
130 (not shown) and no significant differences were observed in the vegetal-animal extension (**Figure 1 - figure**  
131 **supplement 2C**).

132 We also compared the expression of 3 genes involved in notochord development : *floating head (flh)*, *no-*  
133 *tail (ntl)* and *brachyury (bra)* (Glickman et al., 2003; Schulte-Merker et al., 1994; Talbot et al., 1995). At  
134 50% epiboly the homeobox gene *flh* showed localized expression in the dorsal margin (**Figure 1 - figure**  
135 **supplement 2D-E**), without differences neither in width nor in height when compared between  
136 morphotypes (**Figure 1 - figure supplement 2F**). At the same stage *ntl* and *bra* expression extended  
137 homogenously all around the margin (blastopore), hindering the identification of the prospective dorsal  
138 side (**Figure 1 - figure supplement 2G, H and I, J**, respectively). No differences were observed between  
139 surface fish and cavefish.

140 In zebrafish, *dkk1b* is expressed in two spots in the embryonic organizer (Hashimoto et al., 2000) similarly  
141 to the surface fish condition (**Figure 1A**) - although the gap is less pronounced. We reasoned that the size  
142 of the “*dkk1b* gap” may vary due to differences in dorsal convergence and internalization of mesodermal  
143 lineages during gastrulation, relative to epiboly. The narrower domain of *chordin* expression observed in  
144 cavefish compared to surface fish also supported this hypothesis. To test this idea, we next analyzed the  
145 expression of axial mesodermal markers during subsequent stages of gastrulation.

146

#### 147 ***Mesoderm migration timing in A. mexicanus morphotypes***

148 The EVL (enveloping layer) and YSL (yolk syncytial layer) drive epiboly movements that engulf the yolk cell  
149 (Bruce, 2016). Axial mesoderm precursors are mobilized from the dorsal organizer towards the rostral  
150 extreme of the embryo (animal pole), migrating in between the YSL and the epiblast (prospective  
151 neurectoderm). Since these events are important for the induction and patterning of the neural tube, we  
152 compared in detail the process of axial mesoderm migration in *A. mexicanus* morphotypes using markers  
153 of different mesodermal populations, always taking the percentage of epiboly as reference to stage  
154 embryos.

155 The *dkk1b* patterns in the two morphs were also clearly different towards mid-gastrulation. In surface fish,  
156 the two clusters observed at 50% epiboly began to coalesce at the midline at 70% epiboly (**Figure 2A**),  
157 whereas in cavefish *dkk1b* expressing cells became grouped dorsally and leading cells were more advanced  
158 towards the animal pole (arrow in **Figure 2B**). At 80% epiboly, *dkk1b*+ cells in the cavefish were close to  
159 their final position in the anterior prechordal plate at the rostral end of the embryonic axis (arrow **Figure**  
160 **2E**). At the same stage, leading cells expressing *dkk1b* in the surface fish (arrow **Figure 2D**) had reached a  
161 similar distance as they did in cavefish at 70% epiboly (compare values in **Figure 2F** and **2C**). These  
162 expression profiles indicated that even though at 50% epiboly *dkk1b* expression appears very divergent in  
163 the two morphotypes, the cellular arrangement observed later on are similar, although always more  
164 advanced in the cavefish.

165 The same analysis was performed at 70% epiboly for the markers *chordin* (**Figure 2G-I**), *lefty1* (**Figure 2J-**  
166 **L**) and *ntl* (**Figure 2M-O**). These 3 genes showed a greater height value of their expression domain in  
167 cavefish than in surface fish embryos. This further suggested that at equivalent stages during gastrulation  
168 anteroposterior axis formation is more advanced in cavefish.

169 Next, we wondered if the observed phenotype for the cavefish axial mesoderm also extends to the  
170 neighboring paraxial mesoderm, *i.e.*, the mesodermal tissue located laterally that will give rise to the  
171 somites (presomitic mesoderm). We analyzed the expression of *myoD* and *mesogenin 1* (*msgn1*), two  
172 genes coding for bHLH transcription factors required for early specification of myogenic tissue (Weinberg  
173 et al., 1996; Yabe and Takada, 2012). In *A. mexicanus*, at mid-gastrulation *myoD* was expressed in two  
174 domains, triangular in shape, on both sides of the dorsal axial mesoderm, corresponding to the central gap  
175 without expression (**Figure 3A-D**). The height value of the expression domain was higher in cavefish  
176 embryos both at 70% and 80% epiboly compared to the surface fish (**Figure 3E**), whereas the central/dorsal  
177 non-expressing zone was wider in the surface fish at both stages (**Figure 3F**). On the other hand, at the  
178 same stages *msgn1* extended as a ring all around the margin, except on its dorsal aspect, leaving a central  
179 gap (**Figure 3G-J**). For *msgn1* no significant differences were found in the height value at 70% and 80%  
180 epiboly (**Figure 3K**), but similarly to what was observed for *myoD*, the dorsal non-expressing zone was  
181 reduced in cavefish embryos at 80% epiboly (**Figure 3L**). In order to understand the inter-morph  
182 differences observed using these two paraxial mesoderm markers, we performed double ISH. Similar to  
183 what was observed in single ISH, *msgn1* expression extended further ventrally than *myoD* (**Figure 3M, O**;  
184 compare to insets in **Figures 3A, B, G and H**). Differences also existed in the vegetal to animal axis, where  
185 the larger extension encompassed by *myoD* was clear in both morphs (**Figure 3M, O**). These results

186 suggested that the differences observed in our measurements of paraxial mesoderm extension were  
187 mainly due to the cell population expressing *myoD* (but not *msgn1*), which is more advanced towards the  
188 animal end of the embryo (**Figure 3N, P**). In addition, if the size of the central zone where expression of  
189 the two paraxial markers is interrupted is taken as readout of dorsal convergence, these data also suggest  
190 an earlier convergence and extension in cavefish than in surface fish (at a given stage of epiboly).

191

#### 192 ***A. mexicanus* morphotypes exhibit notable differences in axial mesoderm structure**

193 The antero-posterior embryonic axis in *A. mexicanus* is formed after epiboly has been completed, at the  
194 bud-stage (10hpf). The prechordal plate and notochord are the anterior and posterior segments of the  
195 axial mesoderm, respectively, both important for the induction and patterning of neural fates. To compare  
196 the organization of the axial mesoderm in cave and surface embryos, we analyzed the expression of  
197 markers described in the previous sections, to identify specific segments once the antero-posterior axis  
198 has been formed. Using triple fluorescent *in situ* hybridization, three non-overlapping molecular  
199 subdomains were recognized: the anterior prechordal plate or polster labeled by *dkk1b*, the posterior  
200 prechordal plate defined by *shh* expression (wider in cavefish as previously described; Pottin et al., 2011;  
201 Yamamoto et al., 2004) and the notochord more posteriorly, labeled by *ntl* (**Figure 4A, B**). In addition,  
202 *lefty1* expression covered both the anterior and posterior subdomains of the prechordal plate (**Figure 4C-**  
203 **F**). In the posterior prechordal plate *lefty1* and *shh* showed overlapping patterns in both morphotypes  
204 (**Figure 4C, D**), whereas *dkk1b* and *lefty1* showed only minimal co-expression anteriorly (**Figure 4E, F**),  
205 similarly to what we observed at earlier stages (**Figure 4 - figure supplement 1**). Moreover, the distribution  
206 of polster *dkk1b*-expressing cells was strikingly different between the two morphs. In surface fish they  
207 were tightly compacted (**Figure 4A**), while in cavefish they were loosely organized (**Figure 4B**). The number  
208 of *dkk1b*-expressing cells, analyzed in confocal sections, were similar in cavefish and surface fish (**Figure**  
209 **4G**). The distribution of the *dkk1b* cells in the antero-posterior axis, measured by the distance between  
210 the first and the last cells (Length A-P), was identical (**Figure 4H**). However, the *dkk1b*-positive cells covered  
211 a larger extension in the lateral axis (Length lateral) in cavefish embryos (**Figure 4I**), indicating that these  
212 cells are arranged at a lower density as compared to surface fish. A similar pattern was observed for the  
213 anterior domain of *lefty1* expression (compare **Figures 4C, E to 4D, F**). Thus, both the anterior/polster  
214 (*dkk1b*+) and the posterior part (*shh*+) of the prechordal plate are laterally expanded in cavefish.

215 Next, other differences in size or position of axial mesoderm segments at bud stage were explored. The  
216 distance from the anterior-most polster cell expressing *dkk1b* to the leading notochord cell expressing *ntl*



217 was identical in the two morphs (**Figure 4 - figure supplement 2A-C**). Polster cells expressing *dkk1b* laid  
218 just beneath the cells of the anterior neural plate border (*dlx3b+*) in both morphotypes (**Figure 4 - figure**  
219 **supplement 2D, E**). The extension of the notochord was also measured. At bud stage *ntl* and *bra* expression  
220 labeled the notochord in its whole extension (**Figure 4J, K** and not shown). On the other hand, *flh* was  
221 expressed in the posterior end and in a small cluster of the rostral notochord (**Figure 4L, M**) (plus two  
222 bilateral patches in the neural plate probably corresponding to the prospective pineal gland in the  
223 diencephalon). For the three notochordal markers, the distance from the rostral expression boundary to  
224 the tail bud (normalized by the size of the embryo) was larger in cavefish compared to surface fish (**Figure**  
225 **4N-P**). In line with our observations of axial and paraxial mesoderm markers during mid-gastrulation  
226 (**Figure 2-3**), these results suggest a precocious convergence and extension in cavefish compared to  
227 surface fish.

228  
229 ***Testing the effects of heterochrony in gastrulation and gene expression dynamics on brain development***

230 In zebrafish embryos *dkk1b* expression in the prechordal plate becomes downregulated from early  
231 somitogenesis (Hashimoto et al., 2000). Our observations of heterochronic gastrulation events prompted  
232 us to search for potential differences also in the disappearance of *dkk1b* expression later on. In surface  
233 fish *dkk1b* was still expressed in all embryos at the 6 and 8 somite stage (13/13, not shown and 17/17,  
234 **Figure 5A, 6E right**). In contrast, in cavefish *dkk1b* expression was observed only in 46% of the embryos at  
235 6 somites (6/13, always with low signal level) (not shown) and it was absent in 64% of embryos at 8 somite  
236 stage (21/33, **Figure 5B and 6E right**).

237 Given the major spatio-temporal differences in *dkk1b* expression pattern observed from the onset of  
238 gastrulation to the end of neurulation between cave and surface embryos, we also examined its expression  
239 levels through qPCR. While at 50% epiboly *dkk1b* transcript levels were similar in the two morphs (0.95  
240 fold, NS), at bud stage *dkk1b* levels were almost four times lower in cavefish than in surface fish embryos  
241 (0.27 fold).

242 Since *dkk1b* is a strong inhibitor of Wnt signaling, with conserved functions in the regulation of brain  
243 development (Hashimoto et al., 2000; Lewis et al., 2008), the observed differences in cellular  
244 arrangement, expression levels and timing of downregulation in the two *Astyanax* morphotypes may have  
245 downstream consequences in forebrain morphogenesis. This hypothesis was partly tested by treating  
246 surface fish embryos with LiCl (**Figure 5C**), a Wnt- $\beta$ cat pathway activator, to mimic the cavefish situation

247 in which the Wnt antagonist *dkk1b* is expressed at lower levels. In line with results reported in zebrafish  
248 (Shinya et al., 2000), LiCl treatments (0.1 and 0.2M, from 8 to 13hpf) produced a decrease of the size of  
249 the optic vesicle in SF at 13hpf (not shown), and a reduction of the size of the retina and lens at 24hpf  
250 (**Figure 5D-F, H, I**), which are hallmarks of cavefish embryonic eye morphology (Yamamoto et al 2004;  
251 compare to **Figure 5G**). In addition, manipulation of the levels of Wnt- $\beta$ cat signaling in surface fish  
252 produced a misshaped retina with a wider optic stalk (**Figure 5F**). This was observed in 41% and 50% of the  
253 examined eyes of embryos treated with LiCl 0.1M and 0.2M, respectively (**Figure 5J**). A similar phenotype  
254 was seen in 23% of cavefish embryos at the same stage (**Figure 5G, J**). The interpretation of this  
255 morphological phenotype was confirmed molecularly, as the expression domain of the optic stalk marker  
256 *pax2a* was significantly wider at 36hpf in surface fish embryos exposed to LiCl and in cavefish embryos  
257 than in untreated animals (**Figure 5K-N, O**).

258 Together these data strongly suggest that modified levels of Wnt signaling during early embryogenesis  
259 might participate to the developmental evolution of cavefish eye defects.

260

### 261 ***Maternal determinants influence early developmental differences in A. mexicanus morphotypes***

262 The earliest developmental events, including the first cell divisions, breaking of symmetries and induction  
263 of the embryonic organizer, rely exclusively on maternal factors deposited in the oocyte before  
264 fertilization. The findings above showing earlier convergence, extension and internalization of mesodermal  
265 cell populations in the cave morphs, together with differences in the spatio-temporal gene regulation in  
266 tissues derived from the organizer, prompted the examination of precocious embryogenesis and the  
267 investigation of maternal components. The inter-fertility between *A. mexicanus* morphotypes offers a  
268 powerful system to study the potential contribution of these maternally-produced factors to phenotypic  
269 evolution (Ma et al., 2018). We compared gastrulation progression in F1 hybrid embryos obtained from  
270 fertilization of surface fish eggs with cavefish sperm (HybSF), and cavefish eggs with surface fish sperm  
271 (HybCF) (**Figure 6A**). In principle, phenotypic correspondence to the maternal morphotype indicates a  
272 strong maternal effect. Results obtained in F1 hybrids were compared to those obtained from wild type  
273 morphs in previous sections.

274 First, the expression patterns of *dkk1b* during development were compared. At 50% epiboly the  
275 percentages of the phenotypic categories (described in **Figure 1A-C**) in hybrid embryos were strikingly  
276 similar to those of their maternal morphotypes, with the majority of HybSF presenting two spots of *dkk1b*

277 expression as surface fish embryos, whereas most of HybCF embryos showed only one continuous  
278 expression domain (**Figure 6B**). At 70% epiboly the results followed the same trend. In HybSF embryos the  
279 two domains of *dkk1b* expressing cells start to join dorsally, with little advancement towards the animal  
280 pole, similar to surface embryos (**Figure 6C**). In contrast, HybCF were more alike cavefish embryos, with  
281 cells grouped dorsally close to the animal end (**Figure 6C**). Analyses of the distance reached by the leading  
282 cell showed significant differences between the two reciprocal hybrids types, which were identical to their  
283 maternal morphs (**Figure 6C, right**). The expression of *lefty1* and *ntl* at 70% epiboly was also examined in  
284 F1 hybrids (**Figure 6 - figure supplement A and B**, respectively). The advancement of axial mesoderm  
285 populations labeled by the two markers was significantly increased in HybCF compared to HybSF, with  
286 height values akin to their respective maternal morphs (**Figure 6 - figure supplement A, right and B, right**).  
287 These results indicate that spatio-temporal differences observed during gastrulation between cavefish and  
288 surface fish fully depend on maternal contribution.

289 In *A. mexicanus* the prechordal plate at the end of gastrulation showed marked morphotype-specific  
290 differences in cell organization. We evaluated the impact of maternal determinants on these differences  
291 by comparing the expression of *dkk1b* in the F1 hybrids with that of their parental morphotypes (**Figure**  
292 **6D**). We found a broader distribution of *dkk1b*-expressing cells in the HybCF (**Figure 6D, center bottom**)  
293 compared to HybSF (**Figure 6D, left bottom**). The patterns observed in the F1 hybrids were identical to the  
294 patterns on their maternal morphs (**Figure 6D, right**), highlighting the effect of the oocyte composition up  
295 to the end of gastrulation.

296 Next, we tested the maternal contribution to the disappearance of *dkk1b* expression during mid-  
297 somitogenesis described in the previous section. At the 8 somite stage, the segregation of phenotypes in  
298 reciprocal F1 hybrids was not as clear as in the parental morphs (**Figure 6E**). For this reason, we decided  
299 classify the expression patterns of *dkk1b* in four distinct categories: I, widely expressed in the prechordal  
300 plate (**Figure 6E, top left; blue**); II, clear expression in 3-5 cells (**Figure 6E, top right; green**); III, clear  
301 expression in 1-2 cells (**Figure 6E, bottom left; yellow**); and IV, absence of expression (**Figure 6E, bottom**  
302 **right; red**). In hybrids, we found similar percentages of intermediate categories II and III (63-64% in both  
303 cases). However, in HybCF there was an important proportion of category IV embryos (no expression,  
304 16%), closer to the cavefish, while none of the HybSF fell in this category, like surface fish embryos. From  
305 this result we deduced that the downregulation of *dkk1b* expression is still under the influence of maternal  
306 factors, although this influence is weaker than at earlier stages.

307 Finally, we sought to test whether forebrain phenotypes previously described in cavefish at later  
308 embryonic stages could be also influenced by maternal effects, as a long-lasting consequence of the  
309 maternal influence during gastrulation. Hypothalamic, eye and olfactory epithelium development were  
310 analyzed in reciprocal F1 hybrids between 15hpf and 24hpf.

311 Inter-morph variations in the expression domains of the LIM-homeodomain transcription factors *Lhx9* and  
312 *Lhx7* drive changes in Hypocretin and NPY neuropeptidergic neuronal patterning in the hypothalamus,  
313 respectively (Alié et al., 2018). We therefore compared expression domains of *Lhx9* (size of the  
314 hypothalamic domain at 15 hpf; brackets in **Figure 7A, left**) and *Lhx7* (number of positive cells at 24 hpf in  
315 the hypothalamic acroterminal domain; dotted circles in **Figure 7B, left**) and the numbers of their  
316 respective neuropeptidergic Hypocretin and NPY derivatives in the reciprocal hybrids and their parental  
317 morphotypes (**Figures 7C and D**, respectively). In all four cases the analyses showed strong significant  
318 differences between cavefish and surface fish, as previously described (Alié et al., 2018) (**Figure 7A-D**  
319 histograms, \*\*\* for each). In order to help the visualization and interpretation of the F1 hybrid data,  
320 simplified plots were generated (**Figure 7A-D, right**) with the mean values for cavefish and surface fish in  
321 the extremes (red and blue dots, respectively), an average black dot representing the expected value for  
322 the phenotype if there is no effect of any kind (maternal, paternal or allelic dominance), and the HybSF  
323 and HybCF values (light blue and pink respectively). If experimental values are closer to the maternal  
324 morphotype, it can be interpreted as the phenotype being under maternal regulation. Other possibilities,  
325 such as a mix of maternal and zygotic influence, or recessive or dominant effects in heterozygotes can also  
326 be interpreted.

327 For *Lhx9* and *Lhx7*, hybrids values were similar and intermediate between the cave and surface morphs,  
328 with a slight deviation towards the surface morph, more evident for the HybSF (**Figure 7A and B, center**  
329 **and right**). For Hypocretin and NPY neuropeptidergic lineages derived from *Lhx9* and *Lhx7*-expressing  
330 progenitors, respectively, a significant difference in neuron numbers existed between reciprocal hybrids  
331 (**Figure 7C and D**, \* for each), suggesting the involvement of maternal components. Moreover, the number  
332 of Hypocretin neurons in HybSF and the number of NPY neurons in HybCF were identical to their maternal  
333 morphotype, whereas values for their reciprocal hybrids were close to the theoretical intermediate value  
334 (**Figure 7C and D, on the right**). These results suggest that maternal determinants impact at least in part  
335 hypothalamic neuronal differentiation, possibly together with other, complex, allelic dominance or zygotic  
336 mechanisms.

337 In cavefish, the smaller size of the eye primordium and the larger olfactory epithelia compared to surface  
338 fish are also due to modifications of signals emanating from midline organizers, including Shh and Fgf8  
339 (Hinaux et al., 2016; Pottin et al., 2011; Yamamoto et al. , 2004). The size of these sensory structures were  
340 measured in reciprocal hybrids to test if the cascade of events affected by the maternal determinants also  
341 has an impact in their later development. First, in F1 hybrids, the size of the eye ball and the size of the  
342 lens at 24 hpf (dotted lines in **Figure 7E**, DAPI stained embryos) were intermediate between those from  
343 the parental morphs (**Figure 7E and 7F, respectively**), without significant differences between the hybrids  
344 in the ANOVA test. Of note, when considering only the hybrids, the Mann Whitney test showed a  
345 significant difference in lens size (**Figure 7F**, golden star  $p=0.0202$ ), suggesting a reminiscence of maternal  
346 effect. In the plot of mean distribution for eye ball size the F1 hybrid values were close to the expected  
347 mean (**Figure 7E, right**). In the plot for lens size however, the hybrid values were slightly deviated towards  
348 the cavefish mean (**Figure 7F, right**), suggesting also a dominance of cavefish alleles involved in lens  
349 development. Finally, the size of the olfactory epithelium at 24 hpf was similar in HybSF and HybCF (**Figure**  
350 **7G**; DAPI staining, and **Figure 7H**; ISH to *eya2*). In both types of read-outs, the mean values for hybrids  
351 appeared shifted towards surface fish values, suggesting a dominance of the surface fish alleles involved  
352 in the development of the olfactory epithelium.

353 Taken together, these results indicate that the effect of maternal determinants are fully penetrant up top  
354 final stages of gastrulation, suggesting that RNAs and proteins present in the oocyte must vary between  
355 the two *Astyanax* morphotypes. At later developmental stages the maternal effect appears to be “diluted”  
356 by other mechanisms regulating gene expression and morphogenesis, although some differences can still  
357 be observed.

358

### 359 ***Towards identification of varying maternal factors in cavefish***

360 To obtain an exhaustive molecular view of maternal transcriptomic differences between surface and  
361 cavefish, RNA-sequencing was performed on *Astyanax* embryos at 2-cell stage (surface fish, n=2 samples;  
362 cavefish, n=3 samples; and reciprocal F1 hybrids, n=3 samples each). The dataset (between 75 and 100  
363 million paired reads per sample) was analyzed through the European Galaxy Server and reads were aligned  
364 to the Surface Fish *Astyanax* genome (NCBI, GCA\_000372685.2 *Astyanax\_mexicanus*-2.0). The sample-to-  
365 sample distance analysis grouped the four types of samples in two clear categories, strictly depending on  
366 their maternal contribution (**Figure 8A**). Similarly, Principal Component Analyses (PCA) analyses clustered  
367 the samples from hybrid embryos together with those coming from their maternal morphotype (**Figure 8**

368 - **figure supplement A**). These results clearly confirmed that the paternal contribution has no influence on  
369 the egg transcriptome at this stage, so we decided to combine the samples according to their mother  
370 morphotype (pooled surface fish and hybSF, *versus* pooled cavefish and hybCF), thus increasing the  
371 number of samples per condition, and rendering downstream analysis easier and more powerful. To  
372 quantitatively compare the transcriptome of cave and surface eggs, the numbers of differentially  
373 expressed genes (DEG) were assessed (see Methods). Among the 20730 genes that were expressed at 2-  
374 cell stage, close to a third (32%) were differentially expressed between surface and cavefish (**Figure 8B**). A  
375 similar proportion was up- or down-regulated in cavefish relative to surface fish (17.25% and 14.69%,  
376 respectively). To get insights on which biological functions were the most different between eggs of the  
377 two morphotypes, a gene ontology (GO) enrichment analysis was carried out on DEGs with an absolute  
378 fold change higher than 5 ( $\log(\text{FC}) > 2.32193$ ). Among the significantly enriched biological processes that  
379 might be most relevant for our work we found cell adhesion (7.1%) and signaling (6.5%) (**Figure 8C**). When  
380 analyzing separately up- and down-regulated genes for GO enrichment, no biological process was found  
381 enriched in down-regulated genes, whereas the above mentioned processes were still found enriched in  
382 the up-regulated gene subset (**Figure 8 - figure supplement B**). This means that genes involved in ion  
383 transport, cell adhesion and cell signaling are mainly up-regulated in cavefish eggs compared to surface  
384 fish eggs. It is also worth noting that genes involved in metabolism show significant enrichment when  
385 analyzing all the DEGs (fold change higher than 1.5), meaning that “metabolic” transcripts mostly show  
386 fold changes lower than 5 (not shown). Hence the most strongly dysregulated genes are not the ones  
387 involved in metabolism but those involved in signaling and cell interactions. Together, these results show  
388 that the RNA composition of the cavefish and surface fish eggs shows a strong maternal signature, and  
389 thus oocyte content could contribute to the developmental evolution of cavefish phenotype.

390 Finally, we picked two candidate genes from the transcriptomics dataset, that were directly relevant to  
391 our findings in the previous section: *Oep* (*one-eyed pinhead*, also named *tdgf1*), a Nodal co-receptor  
392 necessary for *dkk1b* induction and shield formation and whose maternal and zygotic mutant (*MZoep*)  
393 shows defects in margin internalization and fate specification in zebrafish (Carmany-Rampey & Schier,  
394 2001; Zhang et al., 1998); as well as the maternal ventralizing transcription factor *Vsx1* (*Visual System*  
395 *homeobox 1*) which regulates *flh* and *ntl* expression and is involved in axial *versus* paraxial mesoderm  
396 specification and migration (He et al., 2014; Xu, He et al, 2014). qPCR analyses, on 2hpf embryos, showed  
397 that *Vsx1* and *Oep* mRNA levels were significantly reduced in cavefish (2.50 and 1.75 times less expressed  
398 in cavefish, respectively) confirming the RNA-seq results (8.21 and 1.63 times less respectively). To test for  
399 a possible role of these two maternal down-regulated transcripts in the cavefish gastrulation phenotype,

400 we performed overexpression experiments through mRNA injection at one cell stage in cavefish eggs. As  
401 read-out of these rescue experiments, *dkk1b* expression was examined at 50% and 70% epiboly. *Vsx1*-  
402 injected and *Oep*-injected embryos were similar to control cavefish embryos in terms of spatio-temporal  
403 *dkk1b* pattern, although some signs of disorganization were visible on several specimens (not shown).  
404 Thus, a role for *Vsx1* and *Oep* maternal transcripts in the variations of *dkk1b* expression observed between  
405 the two *Astyanax* morphs is unlikely. Future experiments should focus on transcripts showing high fold-  
406 changes of expression between cavefish and surface fish.

407

## 408 **Discussion**

409 *Astyanax mexicanus* has become an excellent model to uncover developmental mechanisms leading to  
410 phenotypic evolution. Modifications in midline signaling centers during early embryogenesis have led to  
411 troglomorphic adaptations in cavefish, including eye degeneration, larger olfactory epithelia and increased  
412 number of taste buds. Here we show striking temporal, spatial and quantitative differences in the  
413 expression of the Wnt inhibitor *dkk1b* at shield stage and during gastrulation, and we explore the idea that  
414 maternally-regulated gastrulation might be a source of variation contributing to cavefish morphological  
415 evolution.

### 416 ***Prechordal plate and forebrain patterning***

417 Genetic manipulations, tissue ablation and transplantation experiments have demonstrated the  
418 importance of the prechordal plate as a signaling center involved in the patterning of the basal forebrain  
419 (Heisenberg & Nüsslein-Volhard, 1997; Pera & Kessel, 1997). In fish, the prechordal plate is organized in  
420 two domains: the rostral polster (Kimmel et al., 1995) and a posterior domain, abutting caudally with the  
421 notochord. In *A. mexicanus* the expression of *shh* in the posterior prechordal plate occupies a wider  
422 domain in the cavefish compared to surface fish (Pottin et al., 2011; Yamamoto 2004), and enhanced *shh*  
423 signaling has pleiotropic effects in the development of head structures in the cavefish (Yamamoto et al.,  
424 2009). Here we showed that the anterior domain of the prechordal plate is a source of the morphogen  
425 *dkk1b*, whose expression is complementary to that of *shh* at the neural plate stage (**Figure 4A-B**). At this  
426 stage, *dkk1b* expressing cells are organized as a compact cluster in surface fish, while in cavefish they are  
427 more loosely distributed, and with lower levels of *dkk1b* transcripts. Inhibition of Wnt signaling in the  
428 presumptive anterior brain is critical for patterning and morphogenesis. Mouse or *Xenopus* embryos with  
429 impaired *Dkk1* function lack anterior brain structures (Glinka et al., 1998; Mukhopadhyay et al., 2001),

430 whereas misexpression of *dkk1b* in zebrafish embryos produce anteriorization of the neurectoderm,  
431 including enlargement of eyes (Shinya et al., 2000). In *Astyanax* also, we found that Wnt activation in  
432 surface fish embryos by LiCl-treatments, phenocopying the naturally occurring cavefish condition where  
433 lower levels of *Dkk1b* transcripts could lead to lower Wnt inhibition, leads to a reduction of eye and lens  
434 size (**Figure 7C-J**) and an expansion of optic stalk tissue (**Figure 7K-O**), both cavefish-specific hallmarks of  
435 eye development (Yamamoto et al., 2004; Devos et al., 2018). Head development is sensitive to Wnt  
436 signaling dosage (Lewis et al., 2008), and the temporal variations of *dkk1b* expression we observed here  
437 might contribute to forebrain evolution in cavefish. Indeed, the timing and intensity of Wnt (this work)  
438 and Bmp (Hinaux et al., 2016) signaling at the anterior pole of the axial mesoderm must instruct the fate  
439 and morphogenetic movements of overlying anterior neural plate progenitors destined to form the optic  
440 region and the hypothalamus, as well as the placode derivatives (Bielen et al., 2017; Rétaux et al., 2013).

#### 441 ***Embryonic axis formation***

442 The establishment of the embryonic axes and primordial germ layers occurs through complex  
443 morphogenetic cell rearrangements during gastrulation (Schier and Talbot, 2005; Solnica-Krezel and  
444 Sepich, 2012). The main outcomes of gastrulation are the spreading of the blastodermal cells,  
445 internalization of endomesoderm precursors and the elongation of the antero-posterior embryonic axis.  
446 We hypothesized that the differences observed in the axial mesoderm of *A. mexicanus* morphotypes may  
447 be the consequence of upstream events during gastrulation. At equivalent stages, as judged by the  
448 percentage of epiboly, we observed that the advancement of internalized tissues migrating in the vegetal  
449 to animal direction is more precocious in cavefish embryos than in surface fish. Interestingly, this finding  
450 was not only restricted to axial mesodermal elements, but also applied to laterally adjacent paraxial  
451 mesoderm, suggesting a global phenomenon. From the different measurements performed, we inferred  
452 that dorsal convergence and anteroposterior extension might be the driving forces leading to the more  
453 advanced phenotype observed in cavefish gastrulas. Interestingly, the differences in hypoblast movements  
454 we observed, relative to the percentage of epiboly, highlight the uncoupling between gastrulation cell  
455 movements and the epiboly itself, as spectacularly illustrated in the extreme example of annual killifish  
456 embryogenesis (Pereiro et al., 2017). We suggest that these temporal variations in gastrulation events  
457 might later correlate to differences observed in the off-set of *dkk1b* expression, starting in cavefish before  
458 the 6 somite stage and in surface fish after the 8 somite stage.

#### 459 ***Cellular interactions during gastrulation***



460 Gastrulation involves dynamic interactions between different cell populations, while as they move, cells  
461 are exposed to changing signals in their immediate environment. Individual interactions between tissues,  
462 such as the migration of the hypoblast using epiblast as substrate (Smutny et al., 2017) and the influences  
463 that the blastodermal cells receive from direct physical contact with the extraembryonic EVL (Reig et al.,  
464 2017) and YSL (Carvalho & Heisenberg, 2010) must be integrated as gastrulation proceeds. In addition, the  
465 prechordal plate has been described as a cell population undergoing collective migration, implying  
466 numerous cell-cell interactions between prechordal cells themselves (Dumortier et al., 2012; T. Zhang et  
467 al., 2014). Genetic dissection of the parameters regulating prechordal plate migration (Kai et al., 2008), as  
468 well as the identification of intrinsic properties of the moving group (Dumortier et al., 2012), have helped  
469 understanding the molecular and cellular aspects regulating their migration. The markers we used here to  
470 label the prechordal plate during gastrulation suggest that within this domain *lefty1*-expressing cells follow  
471 collective migration as a cohesive group, whereas *dkk1b*+ cells constitute a more dispersed group,  
472 especially in the cavefish, and as also recently observed by Ren et al., 2018. Moreover, increased Nodal  
473 signaling and changed cell distribution have been reported in the organizer in cavefish embryos (Ren et  
474 al., 2018). Together with our observation of earlier movements of axial mesoderm cells in cavefish, these  
475 data suggest that the structural variations in the cavefish prechordal plate may relate to differential  
476 physical and adhesion properties of the organizer/prechordal cells in the two morphs. Live imaging will be  
477 necessary to better compare the properties of prechordal plate cells in cavefish and surface fish.  
478 Moreover, detailed analyses of expression of molecules involved in cell adhesion, such as snails and  
479 cadherins (Blanco et al., 2007; Montero et al., 2005; Shimizu et al., 2005), as well as those involved in  
480 membrane protrusion formation, such as  $\beta$ -actin (Giger & David, 2017), will help to explore the possibility  
481 that divergence in the intrinsic properties of prechordal plate cells may account for cavefish phenotypic  
482 evolution.

### 483 ***Maternal control of gastrulation***

484 Regardless of the striking morphological evolution observed in *A. mexicanus* morphotypes, their time of  
485 divergence has been estimated to be recent (less than 20.000 years ago) (Fumey et al., 2018). The inter-  
486 fertility, reminiscent of such a short divergence time between the two morphs, has allowed the use of  
487 hybrids for the identification of the genetic basis behind phenotypic change (Casane & Rétaux, 2016;  
488 Protas et al., 2006).

489 Since early embryonic development is driven by maternal determinants present in the oocyte before  
490 fecundation, the cross fertility in *A. mexicanus* species is a valuable tool to obtain information about the

491 contribution of maternal effect genes to phenotypic evolution (Ma et al., 2018). Our analyses in F1  
492 reciprocal hybrids demonstrate that the modifications in cavefish gastrulation are fully dependent on  
493 maternal factors. In line with this, our RNAseq analyses showed that the RNA composition of cavefish and  
494 surface fish eggs varied greatly, with 31.94% of the maternal genes expressed at the two-cell stage having  
495 differences in transcripts levels. Together these data strongly suggest that the eggs are a source of  
496 variation that can contribute to phenotypic evolution. In both RNAseq and qPCR analyses the candidate  
497 genes beta-catenin 1 and 2, involved in the establishment of the organizer (Kelly et al., 2000), did not show  
498 significantly different levels of expression. In contrast, two other genes, *oep* and *vsx1*, implicated in the  
499 development of the prechordal plate (Gritsman et al., 1999; Xu et al., 2014) showed reduced levels in  
500 cavefish compared to surface fish. However, overexpression of these two candidate genes by mRNA  
501 injection in cavefish was not able to recapitulate the gastrulation phenotype observed in the surface fish.  
502 Ma et al. (2018) have also recently described increased *pou2f1b*, *runx2b*, and *axin1* mRNA levels in  
503 unfertilized cavefish eggs as compared to surface fish eggs. These genes also show differential expression  
504 in our transcriptomic dataset. Classification of DEGs based on their biological role showed an enrichment  
505 on certain biological processes that may have been key for cavefish evolution. Relevant to this work we  
506 found that 6.5% of the “top DEGs with fold-change>5” are involved in signaling (**Figure 8C**). Some of these  
507 genes are regulators of the Wnt pathway (*i.e.* *sFRP2*, *dkk2* and *wnt11*) that is important for the  
508 establishment of the embryonic organizer. Members of other signaling pathways are also greatly modified  
509 (*i.e.* FGF, BMP, Nodal). Our interpretation is that the origin of the induction of organizers with different  
510 properties in the two morphs might stem in an upstream maternally-regulated event, with a domino effect  
511 leading to morphological and functionally diverse brains. Our results on the impact of maternal  
512 determinants in forebrain morphogenesis are puzzling. Regarding the eye phenotype, our results are  
513 consistent with those of Ma et al., 2018 who examined maternal genetic effects in cavefish eye  
514 development and degeneration: at embryonic stages (12-24hpf), eye size and shape do not seem to be  
515 influenced by maternal factors. However, later larval lens apoptosis and eye regression appear to be under  
516 maternal control (Ma et al., 2018). This fits with our finding that lens size at 24hpf differs between  
517 reciprocal F1 hybrids. Indeed, the defective and apoptotic lens in cavefish is the trigger for eye  
518 degeneration (Yamamoto & Jeffery, 2000) and midline *shh* signaling indirectly impacts this lens-directed  
519 process (Hinaux et al., 2016; Ren et al., 2018; Yamamoto et al., 2004). Hence, the lens phenotype, but not  
520 the retina (which is in fact relatively properly formed and healthy in cavefish embryos), probably results  
521 from maternally-controlled developmental evolution in cavefish. This renders even more mysterious the  
522 long-standing question of what regulates the lens defects and apoptotic process in cavefish embryos.

523 More generally, regarding hypothalamic, eye and olfactory development that we have analyzed, our  
524 interpretation is that although maternal factors greatly influence early developmental decisions, later  
525 phenotypes become “diluted” due to other mechanisms entering into play. We suggest that once zygotic  
526 genome takes control over development, allelic dominance has a major impact on the phenotypes after  
527 15 hpf onwards, although we could still observe some tendency to maternally-controlled phenotypes in  
528 hybrids for some of the traits analyzed. Of note in *Astyanax*, some behavioral traits in adults have already  
529 been shown to be under parental inheritance (Yoshizawa et al., 2012): the vibration attraction behavior  
530 and its underlying sensory receptors (the neuromasts) are under paternal inheritance in cavefish  
531 originating from the Pachón cave, while they are under maternal inheritance in cavefish originating from  
532 the Los Sabinos cave. These examples underscore the different levels of developmental regulation that  
533 must interact to produce a hybrid phenotype.

534 The study of the impact of maternal components in the morphological and developmental evolution of  
535 species is open. To our knowledge, besides *Astyanax* cavefish, only one study reported a maternal  
536 contribution regulating the developmental trajectory of entry into diapause in a killifish (Romney &  
537 Podrabsky, 2017). Thus *Astyanax* cavefish appear as a proper model to disentangle the very early genetic  
538 and embryonic mechanisms of morphological evolution. In addition, modified expression of maternal  
539 genes could be due to differential *cis*-regulation, which for maternal effect genes in the evolutionary  
540 context has not been explored yet to our knowledge in any species.

541

## 542 **Acknowledgements**

543 We thank Stéphane Père, Victor Simon and Krystel Saroul for care of our *Astyanax* colony, and François  
544 Agnès and all other members of the DECA team for fruitful discussions and important suggestions to our  
545 study. This work has benefited from the facilities and expertise of the QPCR and sequencing platforms of  
546 I2BC, Gif sur Yvette. We thank Yan Jaszczyszyn from the I2BC sequencing platform for fruitful interactions.  
547 Grant support: FRM (Equipe FRM DEQ20150331745 RETAUX), CNRS and Becas Chile.

548

549

## 550 **Materials and methods**

551

552 *A. mexicanus* embryos

553 Our surface fish colony originates from rivers in Texas, United States, and our cavefish colony derives from  
554 the Pachón cave in San Luis Potosi, Mexico. Embryos were obtained by *in vitro* fertilization and/or natural  
555 spawnings induced by changes in water temperature (Elipot et al., 2014). Development of *A. mexicanus* at  
556 24°C is similar and synchronous for both morphotypes (Hinaux et al., 2011). For this study morphological  
557 aspects were taken as strict criteria to stage the embryos (number of cells, percentage of epiboly and  
558 number of somites). *In vitro* fertilizations were performed to generate reciprocal F1 hybrids by fecundating  
559 cavefish oocyte with surface fish sperm (HybCF), and surface fish oocyte with cavefish sperm (HybSF).

560

561 *Whole mount in situ hybridization (ISH)*

562 ISH was carried out as previously described (Pottin et al., 2011). Digoxigenin- and Fluorescein-labeled  
563 riboprobes were prepared using PCR products as templates. Genes of interest were searched in an EST  
564 (Expressed sequence tag) library accessible in the laboratory. Clones in library (pCMV-SPORT6 vector):  
565 *chordin* (ARA0AAA23YC10), *dkk1b* (ARA0AAA18YA07EM1), *eya2* (ARA0AAA19YL19EM1), *floating-head*  
566 (ARA0ACA35YA23), *myoD* (ARA0AAA95YG16), *msgn1* (ARA0ACA49YF15), *no-tail* (ARA0ABA99YL22), *npv*  
567 (FO263072), and *vsx1* (ARA0AHA13YJ18). Others: *fgf8* (DQ822511), *lhx9* (EF175738), *shh* (AY661431),  
568 *dlx3b* (AY661432), *hcrt* (XM\_007287820.3), *lhx7* (XM\_022678613) cDNAs were previously cloned. Cloned  
569 for this study: total RNA from *Astyanax* embryos of various stages (2-24 hpf) was reverse-transcribed using  
570 the iScript cDNA synthesis kit (Bio-Rad) and amplified using the following primers:

571 *brachyury*, FP: CACCGGTGGAAGTACGTGAA, RP: GGAGCCGTCGTATGGAGAAG;

572 *lefty1*: FP: ACCATGGCCTCGTGCCTC; RP: TCAGACCACCGAAATGTTGTCCAC

573 Full length cDNAs were cloned into the pCS2+ expression vector using the indicated restriction sites:

574 *dkk1b* (sites EcoRI and XhoI), FP: GGTGGTGAATTCACCATGTGGCCGGCGGCTCTCAGCCCTGACCTTC, RP:  
575 ACCACCCTCGAGTCAGTGTCTCTGGCAGGTATGG;

576 *vsx1* (sites XhoI and XbaI), FP: GGTGGTCTCGAGACCATGGAGAAGACACGCGCG, RP:  
577 ACCACCTCTAGATCAGTTCTCGTTCTCTGAATCGC;

578 *oep* (*tdgf1*) (sites BamHI and XbaI), FP: GGTGGTGGATCCACCATGAGGAGCTCAGTGTTCCAGG, RP:  
579 ACCACCTCTAGATCAAAGCAGAAATGAAAGGAGGAG.

580

581 *mRNA injections*

582 *In vitro* transcription was carried out from PCR products using the SP6 RNA polymerase (mMESSAGE  
583 mMACHINE) to generate full length capped mRNA. Dilutions of the mRNA to 150-200ng/ $\mu$ L were prepared  
584 in phenol red 0.05%. Embryos at the one cell stage were injected with 5–10 nL of working solutions using  
585 borosilicate glass pipettes (GC100F15, Harvard Apparatus LTD) pulled in a Narishige PN-30 Puller (Japan).

586

587 *LiCl treatments*

588 Embryos were enzymatically dechorionated in 1 mg/mL Pronase solution dissolved in EM, then they were  
589 incubated in LiCl solutions, 0.1 or 0.2M prepared in EM water, during the indicated time window. After the  
590 treatment, embryos were washed 5 times in EM, and we let them to develop until the desired stage for  
591 further analyses.

592

593 *Image acquisition and analyses*

594 Whole mounted embryos stained by colorimetric and fluorescent ISH were imaged on a Nikon AZ100  
595 multizoom microscope coupled to a Nikon digital sight DS-Ri1 camera, using the NIS software. Mounted  
596 specimens were image on a Nikon Eclipse E800 microscope equipped with a Nikon DXM 1200 camera  
597 running under Nikon ACT-1 software. Confocal images were captured on a Leica SP8 microscope with the  
598 Leica Application Suite software. Morphometric analyses and cell counting were performed on the Fiji  
599 software (Image J). To measure the approximate extent of migration in the vegetal to animal axis (Height)  
600 we measured the distance from the margin to the leading cell normalized by the distance from the margin  
601 to the animal end (**Figure 2 - figure supplement**). To estimate the extent of dorsal convergence we  
602 measured either the width of the expression domain or the width of gap without expression (for example  
603 for *myoD*) normalized by the total width of the embryo (a representation using the expression of *myoD* at  
604 70% epiboly is shown in **Figure 3 - figure supplement**). All measurements were normalized, unless  
605 otherwise indicated. Another means we used to calculate the width of expression was by measuring the  
606 angle ( $\alpha$ ) of the expression pattern from an animal view, using the center of the opposite site to the  
607 expression domain to set the vertex (a representation using the expression of *chordin* at 50% epiboly is  
608 shown in **Figure 1 - figure supplement 1**). To assess the width of the *pax2a* expression domain in the optic

609 stalk/optic fissure we measured the angle ( $\alpha$ ) with the vertex set in the center of the lens (**Figure 5 - figure**  
610 **supplement D**) Statistical analyses were done in Graph pad prism 5.

611  
612 *mRNA isolation*

613 RNA pools were isolated from cavefish, surface fish and F1 hybrid embryos at the 2-cell stage (three  
614 independent biological replicates for each condition). Each sample corresponded to at least 20 embryos  
615 coming from two female individuals (40 embryos in total) to reduce inter-individual variability. Total RNA  
616 was extracted using TRIzol (Invitrogen, 2 $\mu$ L per embryo) and chloroform (0,2 $\mu$ L per  $\mu$ L of TRIzol) and  
617 purified with isopropanol (0,5 $\mu$ L per  $\mu$ L of TRIzol) and 70% ethanol and treated with DNase. Following  
618 purification, all samples were immediately quantified and assessed for RNA quality (A260/280 ratio ~1.9–  
619 2.1) using a NanoVue Spectrophotometer and stored at  $-80^{\circ}\text{C}$  until use.

620  
621 *qPCR*

622 1  $\mu$ g of total RNA was reverse transcribed in a 20  $\mu$ L final reaction volume using the High Capacity cDNA  
623 Reverse Transcription Kit (Life Technologies) with RNase inhibitor and random primers following the  
624 manufacturer's instructions. Quantitative PCR was performed on a QuantStudio<sup>TM</sup> 12K Flex Real-Time  
625 PCR System with a SYBR green detection protocol at the qPCR platform of the Gif CNRS campus. 3  $\mu$ g of  
626 cDNA were mixed with Fast SYBR<sup>®</sup> R Green Master Mix and 500 nM of each primer in a final volume of 10  
627  $\mu$ L. The reaction mixture was submitted to 40 cycles of PCR (95 $^{\circ}\text{C}$ /20 sec; [95 $^{\circ}\text{C}$ /1 sec; 60 $^{\circ}\text{C}$ /20 sec] X40)  
628 followed by a fusion cycle to analyze the melting curve of the PCR products. Negative controls without the  
629 reverse transcriptase were introduced to verify the absence of genomic DNA contaminants. Primers were  
630 designed using the Primer-Blast tool from NCBI and the Primer Express 3.0 software (Life Technologies).  
631 Primers were defined either in one exon and one exon–exon junction or in two exons span by a large  
632 intron. Specificity and the absence of multilocus matching at the primer site were verified by BLAST  
633 analysis. The amplification efficiencies of primers were generated using the slopes of standard curves  
634 obtained by a fourfold dilution series. Amplification specificity for each real-time PCR reaction was  
635 confirmed by analysis of the dissociation curves. Determined Ct values were then exploited for further  
636 analysis, with the *Gapdh* gene as reference.

637

638 RNAseq analyses of maternal mRNAs

639 RNA sequencing was carried out at the I2BC High throughput sequencing platform  
640 (<https://www.i2bc.paris-saclay.fr/spip.php?article399>) using an Illumina NextSeq 500 sequencing  
641 instrument (version NS500446). All RNA samples were checked with a Bioanalyzer RNA 6000 pico chip  
642 (Agilent technologies) and passed quality threshold (RIN>9) prior to library preparation. Libraries were  
643 generated from purified total RNA using polyA selection (Illumina TruSeq Stranded Protocol). Samples were  
644 sequenced for between 75 and 100 million reads (paired-end, 51-35bp) using the NextSeq 500/550 High  
645 Output Kit v2 (75 cycles). Following sequencing, raw data were retrieved (fastq-formatted files) and used  
646 for subsequent sequence alignment and expression analyses. Raw sequencing data are available through  
647 the NCBI Sequence Reads Archive (SRA) under BioProject accession PRJNA545230.

648 RNA-sequencing reads from each of the four conditions (surface fish, cavefish and reciprocal F1 hybrids)  
649 were trimmed using Cutadapt 1.15 and quality control was assessed using FastQC (v0.11.5). All  
650 downstream analyses were done using the European Galaxy Server (<https://usegalaxy.eu>, (Afgan et al.,  
651 2016)) with reverse (RF) strandness parameter. Reads were aligned to the Surface Fish *Astyanax* genome  
652 (NCBI, GCA\_000372685.2 *Astyanax\_mexicanus*-2.0) using HISAT2 (Galaxy Version 2.1.0, (Kim et al., 2015))  
653 and only perfectly aligned paired reads were kept for the following analysis (Filter SAM and Bam file Galaxy  
654 Version 1.8: Minimum MAPQ quality score 20 and Filter on bitwise flag “Read is paired” and “Read is  
655 mapped in a proper pair”). Then, aligned reads were counted using htseq-count (Galaxy Version 0.9.1,  
656 (Anders et al., 2015)) and the *Astyanax mexicanus* annotation from NCBI release 102  
657 ([https://www.ncbi.nlm.nih.gov/genome/?term=txid7994\[orgn\]](https://www.ncbi.nlm.nih.gov/genome/?term=txid7994[orgn])). Differentially-expressed genes (DEG)  
658 between cavefish and surface fish were detected using DESeq2 (Galaxy Version 2.11.40.6, (Love et al.,  
659 2014)). Based on the PCA and sample to sample distance analyses, data from F1 hybrid were combined  
660 with their respective mother morphotype for the DEG analysis. Only genes with a FDR<0.01 (false  
661 discovery rate, p value adjusted for multiple testing with the Benjamini- Hochberg procedure) and absolute  
662 fold change higher than 1.5 ( $\log_2(\text{FC}) > 0.58$ ) were kept as significantly over- or under-expressed in cavefish  
663 compared to surface fish. Mapped reads were visualized using the genome browser IGV  
664 (<http://www.broadinstitute.org/igv/>) (Robinson et al., 2011).

665 A Gene Ontology Annotation file for the *Astyanax* transcriptome (from NCBI database) was generated  
666 using OmicsBox (formerly Blast2GO, <https://www.biobam.com/>) following the general workflow  
667 presented by the software: BLAST with CloudBlast (restricted to the teleostei database, keeping the top  
668 20 results with an e-value of  $10^{-5}$ ), followed by mapping (GO version April 2019), annotation and

669 InterProScan analysis in parallel. The annotation file was generated by merging the annotated BLAST  
670 results with InterProScan results. Gene Ontology Enrichment analysis on differentially-expressed genes  
671 (FDR<0.01 and FC>1.5) was carried out on Galaxy using GOEnrichment (Galaxy Version 2.0.1) with p-value  
672 cut-off of 0.01. We used several thresholds of fold change (FC>1.5, FC>5, FC>10, FC>20 and FC>50) to  
673 define gene sets and performed the analysis using the genes expressed at 2-cell stage as reference  
674 (n=20730). In this study, on the study gene set with FC>5 was kept as it is the most biologically meaningful.

675

676

## 677 **References**

678 Alié, A., Devos, L., Torres-Paz, J., Prunier, L., Boulet, F., Blin, M., ... Rétaux, S. (2018). Developmental  
679 evolution of the forebrain in cavefish, from natural variations in neuropeptides to behavior. *ELife*, 7.  
680 <https://doi.org/10.7554/eLife.32808>

681 Anders, S., Pyl, P. T., & Huber, W. (2015). HTSeq--a Python framework to work with high-throughput  
682 sequencing data. *Bioinformatics*, 31(2), 166–169. <https://doi.org/10.1093/bioinformatics/btu638>

683 Bielen, H., Pal, S., Tole, S., & Houart, C. (2017). Temporal variations in early developmental decisions: an  
684 engine of forebrain evolution. *Current Opinion in Neurobiology*, 42, 152–159.  
685 <https://doi.org/10.1016/J.CONB.2016.12.008>

686 Bisgrove, B. W., Essner, J. J., & Yost, J. H. (1999). Regulation of midline development by antagonism of  
687 lefty and nodal signaling. *Development*, 126(14), 3253–3262.

688 Blanco, M. J., Barrallo-Gimeno, A., Acloque, H., Reyes, A. E., Tada, M., Allende, M. L., ... Nieto, M. A.  
689 (2007). Snail1a and Snail1b cooperate in the anterior migration of the axial mesendoderm in the  
690 zebrafish embryo. *Development (Cambridge, England)*, 134(22), 4073–4081.  
691 <https://doi.org/10.1242/dev.006858>

692 Blin, M., Tine, E., Meister, L., Elipot, Y., Bibliowicz, J., Espinasa, L., & Rétaux, S. (2018). Developmental  
693 evolution and developmental plasticity of the olfactory epithelium and olfactory skills in Mexican  
694 cavefish. *Developmental Biology*. <https://doi.org/10.1016/J.YDBIO.2018.04.019>

695 Bruce, A. E. E. (2016). Zebrafish epiboly: Spreading thin over the yolk. *Developmental Dynamics*, 245(3),  
696 244–258. <https://doi.org/10.1002/dvdy.24353>



- 697 Carmany-Rampey, A., & Schier, A. F. (2001). Single-cell internalization during zebrafish gastrulation.  
698 *Current Biology*, 11(16), 1261–1265. [https://doi.org/10.1016/S0960-9822\(01\)00353-0](https://doi.org/10.1016/S0960-9822(01)00353-0)
- 699 Carvalho, L., & Heisenberg, C. P. (2010). The yolk syncytial layer in early zebrafish development. *Trends in*  
700 *Cell Biology*, 20(10), 586–592. <https://doi.org/10.1016/j.tcb.2010.06.009>
- 701 Casane, D., & Rétaux, S. (2016). Evolutionary Genetics of the Cavefish *Astyanax mexicanus*. *Advances in*  
702 *Genetics*, 95, 117–159. <https://doi.org/10.1016/BS.ADGEN.2016.03.001>
- 703 Devos, L., Klee, F., Edouard, J., Simon, V., Legendre L., El Khallouki N., Blin M., Barbachou S., Sohm F., &  
704 Sylvie Rétaux (2019). Morphogenetic and patterning defects explain the coloboma phenotype of  
705 the eye in the Mexican cavefish. *BioRxiv*. <https://doi.org/10.1101/698035>
- 706 Dumortier, J. G., Martin, S., Meyer, D., Rosa, F. M., & David, N. B. (2012). Collective mesendoderm  
707 migration relies on an intrinsic directionality signal transmitted through cell contacts. *Proceedings*  
708 *of the National Academy of Sciences*, 109(42), 16945–16950.  
709 <https://doi.org/10.1073/pnas.1205870109>
- 710 Elipot, Y., Hinaux, H., Callebert, J., Launay, J.-M., Blin, M., & Rétaux, S. (2014). A mutation in the enzyme  
711 monoamine oxidase explains part of the *Astyanax* cavefish behavioural syndrome. *Nature*  
712 *Communications*, 5(1), 3647. <https://doi.org/10.1038/ncomms4647>
- 713 Elipot, Y., Legendre, L., Père, S., Sohm, F., & Rétaux, S. (2014). *Astyanax* Transgenesis and Husbandry:  
714 How Cavefish Enters the Laboratory. *Zebrafish*, 11(4), 291–299.  
715 <https://doi.org/10.1089/zeb.2014.1005>
- 716 Elliott, W. R. (2018). The *Astyanax* caves of Mexico. Cavefishes of Tamaulipas, San Luis Potosi, and  
717 Guerrero. Association for Mexican cave studies Bulletin 26.
- 718 Fumey, J., Hinaux, H., Noirot, C., Thermes, C., Rétaux, S., & Casane, D. (2018). Evidence for late  
719 Pleistocene origin of *Astyanax mexicanus* cavefish. *BMC Evolutionary Biology*, 18(1), 43.  
720 <https://doi.org/10.1186/s12862-018-1156-7>
- 721 García-Calero, E., Fernández-Garre, P., Martínez, S., & Puellas, L. (2008). Early mammillary pouch  
722 specification in the course of prechordal ventralization of the forebrain tegmentum. *Developmental*  
723 *Biology*, 320(2), 366–377. <https://doi.org/10.1016/j.ydbio.2008.05.545>
- 724 Giger, F. A., & David, N. B. (2017). Endodermal germ-layer formation through active actin-driven

- 725 migration triggered by N-cadherin. *Proceedings of the National Academy of Sciences*, 114(38),  
726 201708116. <https://doi.org/10.1073/pnas.1708116114>
- 727 Glickman, N. S., Kimmel, C. B., Jones, M., & Adams, R. J. (2003). Shaping the zebrafish notochord.  
728 *Development*, 130(5), 873–887. <https://doi.org/10.1242/dev.00314>
- 729 Glinka, A., Wu, W., Delius, H., Monaghan, A. P., Blumenstock, C., & Niehrs, C. (1998). Dickkopf-1 is a  
730 member of a new family of secreted proteins and functions in head induction. *Nature*, 391(6665),  
731 357–362. <https://doi.org/10.1038/34848>
- 732 Gritsman, K., Zhang, J., Cheng, S., Heckscher, E., Talbot, W. S., & Schier, A. F. (1999). The EGF-CFC protein  
733 one-eyed pinhead is essential for nodal signaling. *Cell*, 97(1), 121–132.  
734 [https://doi.org/10.1016/S0092-8674\(00\)80720-5](https://doi.org/10.1016/S0092-8674(00)80720-5)
- 735 Hashimoto, H., Itoh, M., Yamanaka, Y., Yamashita, S., Shimizu, T., Solnica-Krezel, L., ... Hirano, T. (2000).  
736 Zebrafish Dkk1 functions in forebrain specification and axial mesendoderm formation.  
737 *Developmental Biology*, 217(1), 138–152. <https://doi.org/10.1006/dbio.1999.9537>
- 738 He, Y., Xu, X., Zhao, S., Ma, S., Sun, L., Liu, Z., & Luo, C. (2014). Maternal control of axial-paraxial  
739 mesoderm patterning via direct transcriptional repression in zebrafish. *Developmental Biology*,  
740 386(1), 96–110. <https://doi.org/10.1016/j.ydbio.2013.11.022>
- 741 Heisenberg, C. P., & Nüsslein-Volhard, C. (1997). The function of silberblick in the positioning of the eye  
742 anlage in the zebrafish embryo. *Developmental Biology*, 184(1), 85–94.  
743 <https://doi.org/10.1006/dbio.1997.8511>
- 744 Hinaux, H., Devos, L., Blin, M., Elipot, Y., Bibliowicz, J., Alié, A., & Rétaux, S. (2016). Sensory evolution in  
745 blind cavefish is driven by early embryonic events during gastrulation and neurulation.  
746 *Development*, 143(23), 4521–4532. <https://doi.org/10.1242/dev.141291>
- 747 Hinaux, H., Pottin, K., Chalhoub, H., Père, S., Elipot, Y., Legendre, L., & Rétaux, S. (2011). A Developmental  
748 Staging Table for *Astyanax mexicanus* Surface Fish and Pachón Cavefish. *Zebrafish*, 8(4), 155–165.  
749 <https://doi.org/10.1089/zeb.2011.0713>
- 750 Jaggard, J. B., Stahl, B. A., Lloyd, E., Prober, D. A., Duboue, E. R., & Keene, A. C. (2018). Hypocretin  
751 underlies the evolution of sleep loss in the Mexican cavefish. *ELife*, 7.  
752 <https://doi.org/10.7554/eLife.32637>

- 753 Kai, M., Heisenberg, C.-P., & Tada, M. (2008). Sphingosine-1-phosphate receptors regulate individual cell  
754 behaviours underlying the directed migration of prechordal plate progenitor cells during zebrafish  
755 gastrulation. *Development*, 135(18), 3043–3051. <https://doi.org/10.1242/dev.020396>
- 756 Kelly, C., Chin, a J., Leatherman, J. L., Kozlowski, D. J., & Weinberg, E. S. (2000). Maternally controlled  
757 (beta)-catenin-mediated signaling is required for organizer formation in the zebrafish. *Development*  
758 (*Cambridge, England*), 127, 3899–3911.
- 759 Kim, D., Langmead, B., & Salzberg, S. L. (2015). HISAT: a fast spliced aligner with low memory  
760 requirements. *Nature Methods*, 12(4), 357–360. <https://doi.org/10.1038/nmeth.3317>
- 761 Kimmel, C. B., Ballard, W. W., Kimmel, S. R., Ullmann, B., & Schilling, T. F. (1995). Stages of embryonic  
762 development of the zebrafish. *Developmental Dynamics : An Official Publication of the American*  
763 *Association of Anatomists*, 203(3), 253–310. <https://doi.org/10.1002/aja.1002030302>
- 764 Langdon, Y. G., & Mullins, M. C. (2011). Maternal and Zygotic Control of Zebrafish Dorsoventral Axial  
765 Patterning. *Annual Review of Genetics*, 45(1), 357–377. [https://doi.org/10.1146/annurev-genet-](https://doi.org/10.1146/annurev-genet-110410-132517)  
766 [110410-132517](https://doi.org/10.1146/annurev-genet-110410-132517)
- 767 Lewis, S. L., Khoo, P.-L., De Young, R. A., Steiner, K., Wilcock, C., Mukhopadhyay, M., ... Tam, P. P. L.  
768 (2008). Dkk1 and Wnt3 interact to control head morphogenesis in the mouse. *Development*  
769 (*Cambridge, England*), 135(10), 1791–1801. <https://doi.org/10.1242/dev.018853>
- 770 Love, M. I., Huber, W., & Anders, S. (2014). Moderated estimation of fold change and dispersion for RNA-  
771 seq data with DESeq2. *Genome Biology*, 15(12), 1–21. <https://doi.org/10.1186/s13059-014-0550-8>
- 772 Ma, L., Strickler, A. G., Parkhurst, A., Yoshizawa, M., Shi, J., & Jeffery, W. R. (2018). Maternal genetic  
773 effects in *Astyanax* cavefish development. *Developmental Biology*, 441(2), 209–220.  
774 <https://doi.org/10.1016/J.YDBIO.2018.07.014>
- 775 Meno, C., Shiono, A., Saijoh, Y., Yashiro, K., Mochida, K., Ohishi, S., ... Hamada, H. (1998). lefty-1 Is  
776 Required for Left-Right Determination as a Regulator of lefty-2 and nodal. *Cell*, 94(3), 287–297.  
777 [https://doi.org/10.1016/S0092-8674\(00\)81472-5](https://doi.org/10.1016/S0092-8674(00)81472-5)
- 778 Menuet, A., Alunni, A., Joly, J., Jeffery, W. R., & Rétaux, S. (2007). Expanded expression of Sonic  
779 Hedgehog in *Astyanax* cavefish : multiple consequences on forebrain development and evolution,  
780 855, 845–855. <https://doi.org/10.1242/dev.02780>

- 781 Miller-Bertoglio, V. E., Fisher, S., Sánchez, A., Mullins, M. C., & Halpern, M. E. (1997). Differential  
782 Regulation of chordin Expression Domains in Mutant Zebrafish. *Developmental Biology*, 192(2),  
783 537–550. <https://doi.org/10.1006/DBIO.1997.8788>
- 784 Mitchell RW, Russell WH, Elliott WR. (1977). Mexican eyeless characin fishes, genus *Astyanax*:  
785 environment, distribution and evolution. *Spec Publ Mus Texas Techn University* 12:1–89.
- 786 Montero, J. A., Carvalho, L., Wilsch-Bräuninger M., Kilian B., Mustafa C. & Heisenberg C.P. (2005). Shield  
787 formation at the onset of zebrafish gastrulation. *Development*, 132(6), 1187–1198.  
788 <https://doi.org/10.1242/dev.01667>
- 789 Mukhopadhyay, M., Shtrom, S., Rodriguez-Esteban, C., Chen, L., Tsukui, T., Gomer, L., ... Westphal, H.  
790 (2001). *Dickkopf1 Is Required for Embryonic Head Induction and Limb Morphogenesis in the Mouse*.  
791 *Developmental Cell*, 1, 423-434. [https://doi.org/10.1016/S1534-5807\(01\)00041-7](https://doi.org/10.1016/S1534-5807(01)00041-7)
- 792 Nojima, H., Shimizu, T., Kim, C. H., Yabe, T., Bae, Y. K., Muraoka, O., ... Hibi, M. (2004). Genetic evidence  
793 for involvement of maternally derived Wnt canonical signaling in dorsal determination in zebrafish.  
794 *Mechanisms of Development*, 121(4), 371–386. <https://doi.org/10.1016/j.mod.2004.02.003>
- 795 Pera, E. M., & Kessel, M. (1997). Patterning of the chick forebrain anlage by the prechordal plate.  
796 *Development (Cambridge, England)*, 124(20), 4153–4162. Retrieved from  
797 <http://www.ncbi.nlm.nih.gov/pubmed/9374411>
- 798 Pereiro, L., Loosli, F., Fernández, J., Härtel, S., Wittbrodt, J., & Concha, M. L. (2017). Gastrulation in an  
799 annual killifish: Molecular and cellular events during germ layer formation in *Austrolebias*.  
800 *Developmental Dynamics*, 246(11), 812–826. <https://doi.org/10.1002/dvdy.24496>
- 801 Pottin, K., Hinaux, H., & Rétaux, S. (2011). Restoring eye size in *Astyanax mexicanus* blind cavefish  
802 embryos through modulation of the Shh and Fgf8 forebrain organising centres, 2476, 2467–2476.  
803 <https://doi.org/10.1242/dev.054106>
- 804 Protas, M. E., Hersey, C., Kochanek, D., Zhou, Y., Wilkens, H., Jeffery, W. R., ... Tabin, C. J. (2006). Genetic  
805 analysis of cavefish reveals molecular convergence in the evolution of albinism. *Nature Genetics*,  
806 38(1), 107–111. <https://doi.org/10.1038/ng1700>
- 807 Puellas, L., & Rubenstein, J. L. R. (2015). A new scenario of hypothalamic organization: rationale of new  
808 hypotheses introduced in the updated prosomeric model. *Frontiers in Neuroanatomy*, 9(MARCH).  
809 <https://doi.org/10.3389/fnana.2015.00027>

- 810 Reig, G., Cerda, M., Sepúlveda, N., Flores, D., Castañeda, V., Tada, M., ... Concha, M. L. (2017). Extra-  
811 embryonic tissue spreading directs early embryo morphogenesis in killifish. *Nature*  
812 *Communications*, 8, 1–14. <https://doi.org/10.1038/ncomms15431>
- 813 Ren, X., Hamilton, N., Müller, F., & Yamamoto, Y. (2018). Cellular rearrangement of the prechordal plate  
814 contributes to eye degeneration in the cavefish. *Developmental Biology*, 441(2), 221–234.  
815 <https://doi.org/10.1016/j.ydbio.2018.07.017>
- 816 Rétaux, S., Bourrat, F., Joly, J.-S., & Hinaux, H. (2013). Perspectives in Evo-Devo of the Vertebrate Brain.  
817 In *Advances in Evolutionary Developmental Biology* (pp. 151–172). Hoboken, NJ, USA: John Wiley &  
818 Sons, Inc. <https://doi.org/10.1002/9781118707449.ch8>
- 819 Robinson, J. T., Thorvaldsdóttir, H., Winckler, W., Guttman, M., Lander, E. S., Getz, G., & Mesirov, J. P.  
820 (2011). Integrative genomics viewer. *Nature Biotechnology*, 29(1), 24–26.  
821 <https://doi.org/10.1038/nbt.1754>
- 822 Romney, A. L., & Podrabsky, J. E. (2017). Transcriptomic analysis of maternally provisioned cues for  
823 phenotypic plasticity in the annual killifish, *Austrofundulus limnaeus*, 8.  
824 <https://doi.org/10.1186/s13227-017-0069-7>
- 825 Schier, A. F., & Talbot, W. S. (2005). Molecular Genetics of Axis Formation in Zebrafish. *Annual Review of*  
826 *Genetics*, 39(1), 561–613. <https://doi.org/10.1146/annurev.genet.37.110801.143752>
- 827 Schulte-Merker, S., Hammerschmidt, M., Beuchle, D., Cho, K. W., De Robertis, E. M., & Nüsslein-Volhard,  
828 C. (1994). Expression of zebrafish goosecoid and no tail gene products in wild-type and mutant no  
829 tail embryos. *Development (Cambridge, England)*, 120(4), 843–852.
- 830 Shimizu, T., Yabe, T., Muraoka, O., Yonemura, S., Aramaki, S., Hatta, K., ... Hibi, M. (2005). E-cadherin is  
831 required for gastrulation cell movements in zebrafish. *Mechanisms of Development*, 122(6), 747–  
832 763. <https://doi.org/10.1016/j.mod.2005.03.008>
- 833 Shinya, M., Eschbach, C., Clark, M., Lehrach, H., & Furutani-Seiki, M. (2000). Zebrafish Dkk1, induced by  
834 the pre-MBT Wnt signaling, is secreted from the prechordal plate and patterns the anterior neural  
835 plate. *Mechanisms of Development*, 98(1–2), 3–17. [https://doi.org/10.1016/S0925-4773\(00\)00433-](https://doi.org/10.1016/S0925-4773(00)00433-0)  
836 0
- 837 Smutny, M., Ákos, Z., Grigolon, S., Shamipour, S., Ruprecht, V., Čapek, D., ... Heisenberg, C. P. (2017).  
838 Friction forces position the neural anlage. *Nature Cell Biology*, 19(4), 306–317.

- 839 <https://doi.org/10.1038/ncb3492>
- 840 Solnica-Krezel, Lila, & Sepich, D. S. (2012). Gastrulation: Making and Shaping Germ Layers. *Annual Review*  
841 *of Cell and Developmental Biology*, 28(1), 687–717. [https://doi.org/10.1146/annurev-cellbio-](https://doi.org/10.1146/annurev-cellbio-092910-154043)  
842 092910-154043
- 843 Solnica-Krezel, Lilianna. (2005). Conserved patterns of cell movements during vertebrate gastrulation.  
844 *Current Biology*, 15(6), 213–228. <https://doi.org/10.1016/j.cub.2005.03.016>
- 845 Talbot, W. S., Trevarrow, B., Halpern, M. E., Melby, A. E., Farr, G., Postlethwait, J. H., ... Kimelman, D.  
846 (1995). A homeobox gene essential for zebrafish notochord development. *Nature*, 378(6553), 150–  
847 157. <https://doi.org/10.1038/378150a0>
- 848 Varatharasan, N., Croll, R. P., & Franz-Odenaal, T. (2009). Taste bud development and patterning in  
849 sighted and blind morphs of *Astyanax mexicanus*. *Developmental Dynamics*, 238(12), 3056–3064.  
850 <https://doi.org/10.1002/dvdy.22144>
- 851 Weinberg, E. S., Allende, M. L., Kelly, C. S., Abdelhamid, a, Murakami, T., Andermann, P., ... Riggelman, B.  
852 (1996). Developmental regulation of zebrafish MyoD in wild-type, no tail and spadetail embryos.  
853 *Development (Cambridge, England)*, 122(1), 271–280. <https://doi.org/10.1242/dev.00400>
- 854 Xu, X., He, Y., Sun, L., Ma, S., & Luo, C. (2014). Maternal Vsx1 plays an essential role in regulating  
855 prechordal mesendoderm and forebrain formation in zebrafish. *Developmental Biology*, 394(2),  
856 264–276. <https://doi.org/10.1016/j.ydbio.2014.08.011>
- 857 Yabe, T., & Takada, S. (2012). Mesogenin causes embryonic mesoderm progenitors to differentiate  
858 during development of zebrafish tail somites. *Developmental Biology*, 370(2), 213–222.  
859 <https://doi.org/10.1016/J.YDBIO.2012.07.029>
- 860 Yamamoto, Y, & Jeffery, W. R. (2000). Central role for the lens in cave fish eye degeneration. *Science*  
861 *(New York, N.Y.)*, 289(5479), 631–633. <https://doi.org/10.1126/SCIENCE.289.5479.631>
- 862 Yamamoto, Yoshiyuki, Byerly, M. S., Jackman, W. R., & Jeffery, W. R. (2009). Pleiotropic functions of  
863 embryonic sonic hedgehog expression link jaw and taste bud amplification with eye loss during  
864 cavefish evolution. *Developmental Biology*, 330(1), 200–211.  
865 <https://doi.org/10.1016/j.ydbio.2009.03.003>
- 866 Yamamoto, Yoshiyuki, Stock, D. W., & Jeffery, W. R. (2004). Hedgehog signalling controls eye

- 867 degeneration in blind cavefish, *431*(October). <https://doi.org/10.1038/nature02906.1>.
- 868 Yoshizawa, M., Ashida, G., & Jeffery, W. R. (2012). Parental genetic effects in a cavefish adaptive  
869 behavior explain disparity between nuclear and mitochondrial DNA. *Evolution*, *66*(9), 2975–2982.  
870 <https://doi.org/10.1111/j.1558-5646.2012.01651.x>
- 871 Yoshizawa, M., Gorički, Š., Soares, D., & Jeffery, W. R. (2010). Evolution of a behavioral shift mediated by  
872 superficial neuromasts helps cavefish find food in darkness. *Current Biology*, *20*(18), 1631–1636.  
873 <https://doi.org/10.1016/j.cub.2010.07.017>
- 874 Yoshizawa, M., Jeffery, W. R., Netten, S. M. Van, & Mchenry, M. J. (2014). The sensitivity of lateral line  
875 receptors and their role in the behavior of Mexican blind cavefish ( *Astyanax mexicanus* ), 886–895.  
876 <https://doi.org/10.1242/jeb.094599>
- 877 Zhang, Jian, Houston, D. W., King, M. Lou, Payne, C., Wylie, C., & Heasman, J. (1998). The Role of  
878 Maternal VegT in Establishing the Primary Germ Layers in *Xenopus* Embryos. *Cell*, *94*(4), 515–524.  
879 [https://doi.org/10.1016/S0092-8674\(00\)81592-5](https://doi.org/10.1016/S0092-8674(00)81592-5)
- 880 Zhang, Jiaojiao, Talbot, W. S., & Schier, A. F. (1998). Positional Cloning Identifies Zebrafish one-eyed  
881 pinhead as a Permissive EGF-Related Ligand Required during Gastrulation. *Cell*, *92*(2), 241–251.  
882 [https://doi.org/10.1016/S0092-8674\(00\)80918-6](https://doi.org/10.1016/S0092-8674(00)80918-6)
- 883 Zhang, T., Yin, C., Qiao, L., Jing, L., Li, H., Xiao, C., ... Mo, X. (2014). Stat3-Efemp2a modulates the fibrillar  
884 matrix for cohesive movement of prechordal plate progenitors. *Development*, *141*(22), 4332–4342.  
885 <https://doi.org/10.1242/dev.104885>

886

887

888

889

890

891

892 **Figures and legends**

893

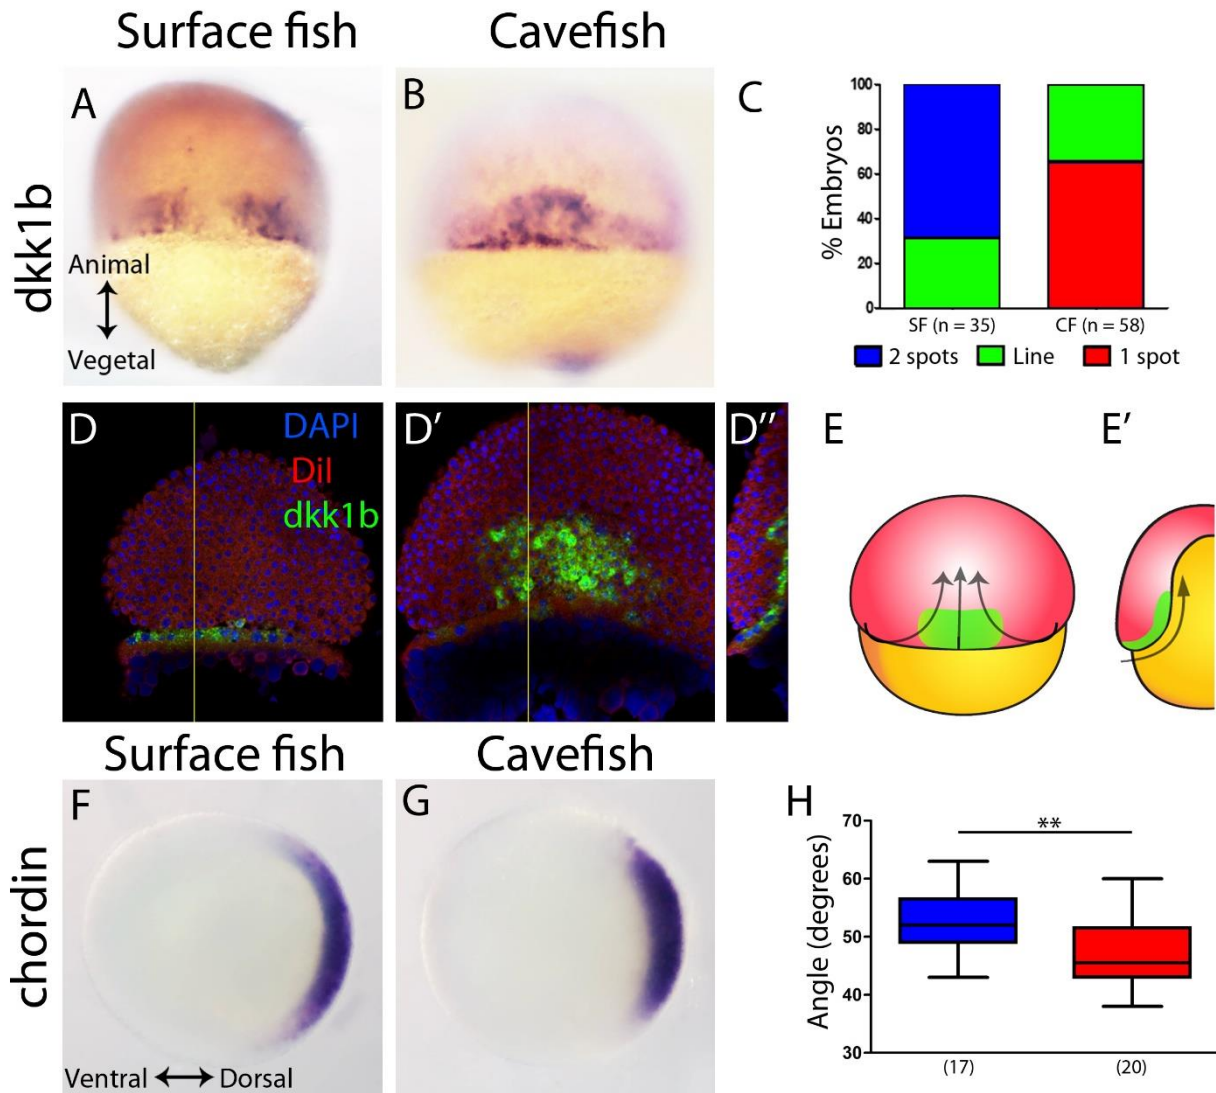

894

895 **Figure 1.- Expression of genes in the organizer at 50% epiboly in surface fish and cavefish.**

896 (A-B) Expression of *dkk1b* in surface fish (A) and cavefish (B) in dorsal view. (C) Quantification of the  
 897 expression patterns observed in each morphotype. The Y-axis indicates the percentage of embryos  
 898 belonging to each of the categories and the number of embryos analyzed is indicated. “Two spots” (blue)  
 899 is the pattern observed in A, “1 spot” (red) is the pattern observed in B, and “Line” is an intermediate  
 900 profile (not shown). (D-D’’) Confocal optical sections of superficial (D) and deep (D’) planes and orthogonal  
 901 section (D’’) at the level of the yellow line in D-D’ of a cavefish embryo stained with Dil (red) and DAPI  
 902 (blue) after fluorescent ISH to *dkk1b*. Representation of the cell movements of convergence and  
 903 internalization (arrows) in a dorsal view (E) and in a section (E’), with the *dkk1b*+ cells in green. (F-G)  
 904 Expression of *chordin* in surface fish (F) and cavefish (G) in animal view. (H) Quantification of the angle



905 covered *chordin* expression pattern. A, B, D, D' are dorsal views, animal pole upwards. F, G are animal  
906 views, dorsal to the right. Mann-Whitney test was performed in H, \*\* = 0.0083.

907

908

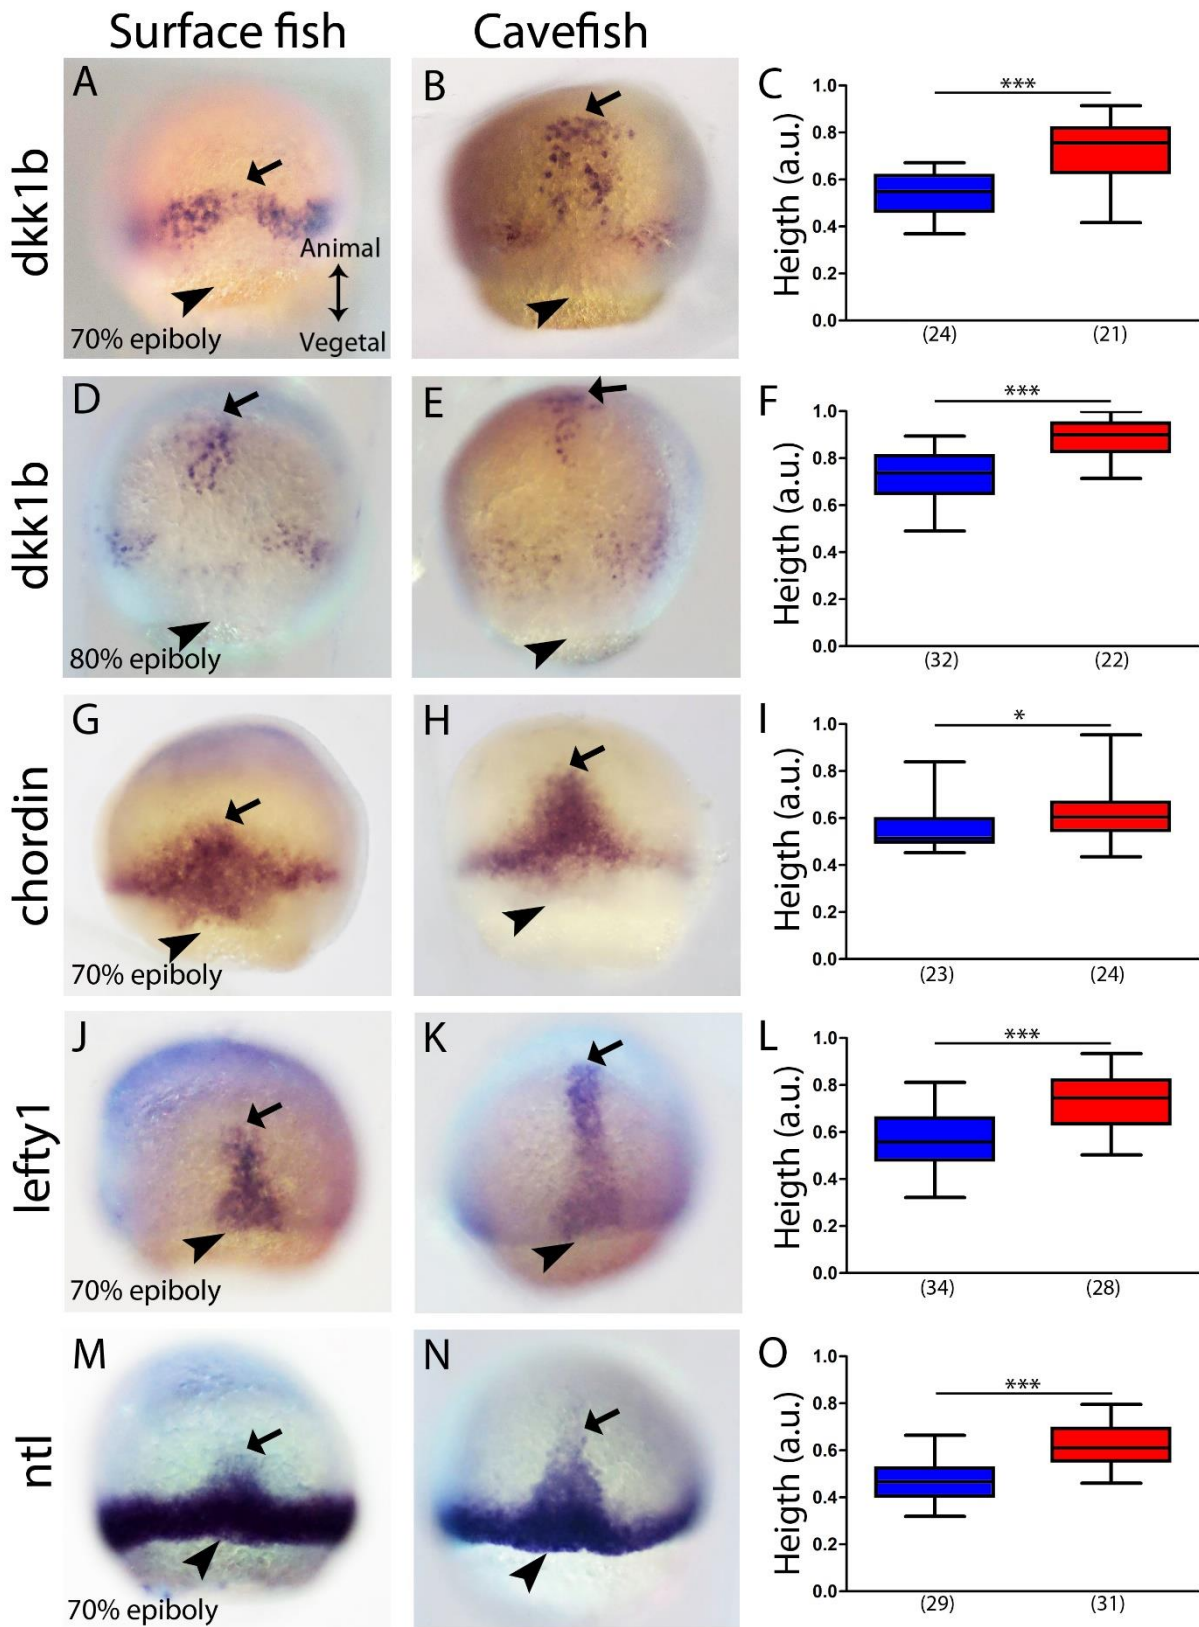

910 **Figure 2.- Expression of axial mesodermal genes during mid-gastrulation in surface fish and cavefish.**

911 (A-B, D-E) Expression of *dkk1b* in surface fish (A, D) and cavefish (B, E) at 70 and 80 % epiboly (A-B and D-  
912 E, respectively). (C, F) Quantification of height in *dkk1b* labeled embryos at 70 and 80% epiboly (C and F,  
913 respectively). (G-H) Expression of *chordin* in surface fish (G) and cavefish (H) at 70% epiboly. (I)  
914 Quantification of height in *chordin* labeled embryos at 70% epiboly. (J-K) Expression of *lefty1* in surface  
915 fish (J) and cavefish (K) at 70% epiboly. (L) Quantification of height in *lefty1* labeled embryos at 70%  
916 epiboly. (M-N) Expression of *ntl* in surface fish (M) and cavefish (N) at 70% epiboly. (O) Quantification of  
917 height in *ntl* labeled embryos at 70% epiboly. Embryos in dorsal views, animal pole upwards. Mann-  
918 Whitney test were performed. \*\*\* < 0.0001, \* = 0.0167 (I).

919

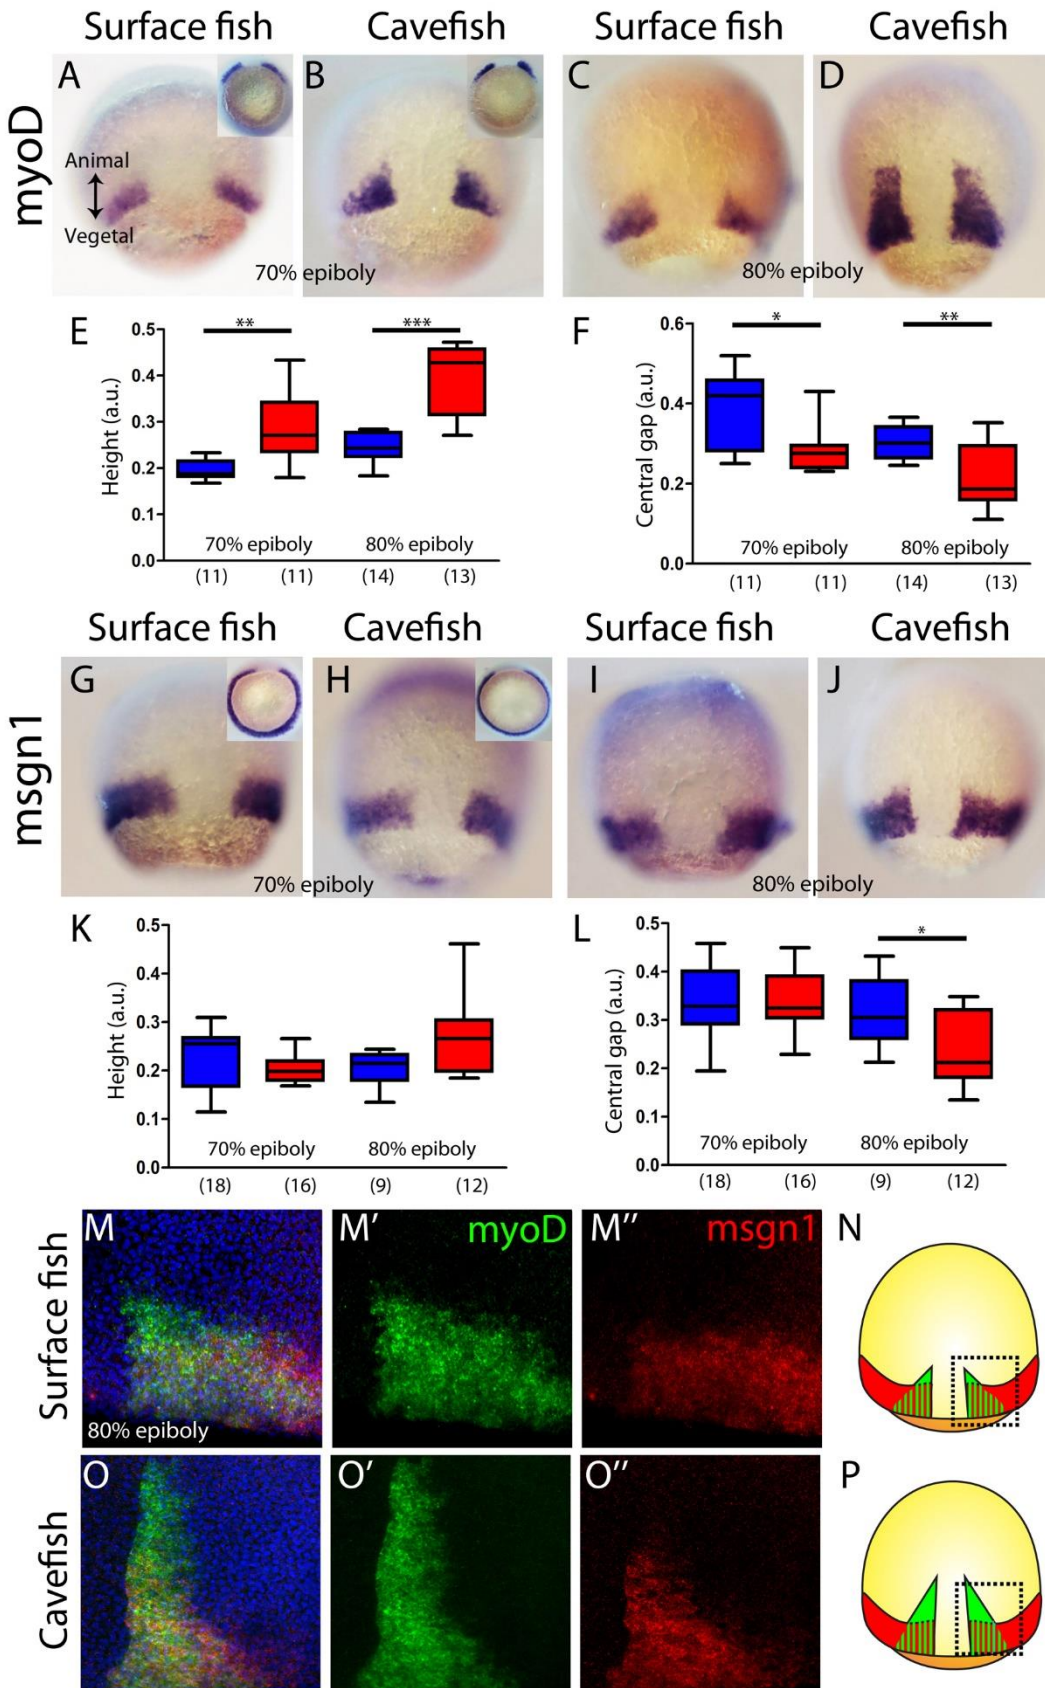

921 **Figure 3.- Internalization of paraxial mesoderm in surface fish and cavefish.**

922 (A-D) Expression of *myoD* in surface fish (A, C) and cavefish (B, D) at 70 and 80% epiboly (A, B and C, D,  
923 respectively). Insets in A and B show the corresponding embryos in a vegetal view. (E) Quantification of  
924 height in *myoD* labeled embryos at 70 and 80% epiboly (left and right, respectively). (F) Quantification of  
925 central non-expressing zone in *myoD* labeled embryos at 70 and 80% epiboly (left and right, respectively).

926 (G-J) Expression of *msgn1* in surface fish (G, I) and cavefish (H, J) at 70 and 80% epiboly (G, H and I, J,  
927 respectively). Insets in G and H show the corresponding embryos in a vegetal view. (K) Quantification of  
928 height in *msgn1* labeled embryos at 70 and 80% epiboly (left and right, respectively). (L) Quantification of  
929 central non-expressing zone in *msgn1* labeled embryos at 70 and 80% epiboly (left and right, respectively).

930 (M-M'' and O-O''). Confocal projection (20-30  $\mu$ m) showing the expression of *myoD* (green) and *msgn1*  
931 (red) double stained surface fish and cavefish embryos (M-M'' and O-O'', respectively) at 80% epiboly.  
932 DAPI was used as a counterstain (blue nuclei). (N and P) representations of surface fish (N) and cavefish  
933 (P) embryos, indicating in black dashed lines the regions of interest showed in M and O. Mann-Whitney  
934 tests were performed. \*\* = 0.0025 (E, left), \*\*\* <0.0001 (E, right), \* = 0.0181 (F, left), \*\* = 0.0094 (F, right),  
935 \* = 0.0209 (L, right). Embryos in dorsal views, animal pole on top; insets on vegetal view, dorsal on top.

936

937

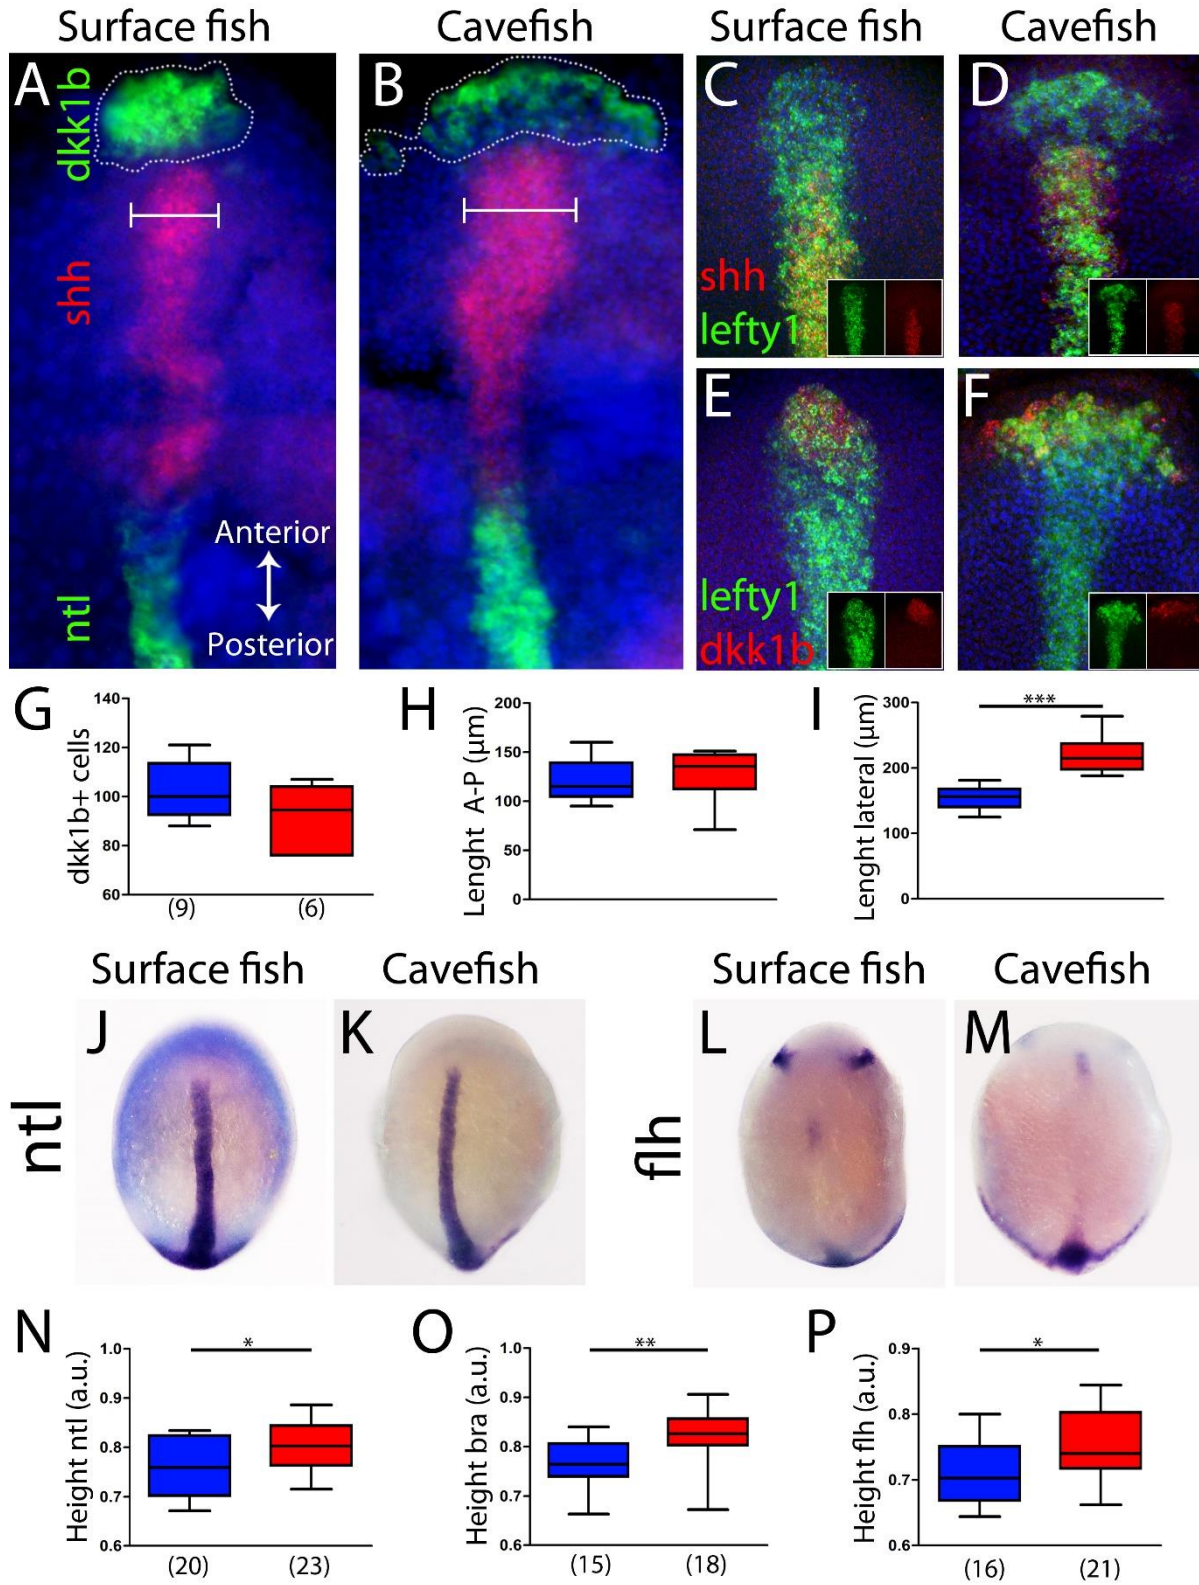

938

939

940 **Figure 4.- Axial mesoderm organization in surface fish and cavefish.**

941 (A-B) Triple ISH to *dkk1b* (green, rostral), *shh* (red, central) and *ntl* (green, posterior) in surface fish (A) and  
942 cavefish (B). (C-D) Confocal projection (20-30  $\mu\text{m}$ ) showing the expression of *shh* (red) and *lefty1* (green)  
943 in surface fish (C) and cavefish embryos (D). Insets show the individual channels. (E-F) Confocal projection  
944 (20-30  $\mu\text{m}$ ) showing the expression of *dkk1b* (red) and *lefty1* (green) in surface fish (E) and cavefish  
945 embryos (F). Insets show the split channels. (G) Quantification of number of cells expressing *dkk1b*. (H)  
946 Quantification of the distance between the *dkk1b* expressing cells located in the extremes of the antero-  
947 posterior axis. (I) Quantification of the distance between the *dkk1b* expressing cells in lateral extremes. (J-  
948 K) Expression of *ntl* in surface fish (J) and cavefish (K). (L-M) Expression of *flh* in surface fish (L) and cavefish  
949 (M). (N) Quantification of height in *ntl* labeled embryos. (O) Quantification of height in *bra* labeled  
950 embryos. (P) Quantification of height in *flh* labeled embryos. All embryos at tail bud stage, in dorsal view,  
951 anterior upwards. Pictures A-F are flat mounted embryos and pictures J-M are whole mount embryos.  
952 Mann-Whitney tests were performed. \*\*\* < 0.0001 (I), \* = 0.0396 (N), \*\* = 0.0012 (O), \* = 0.0142 (P).

953

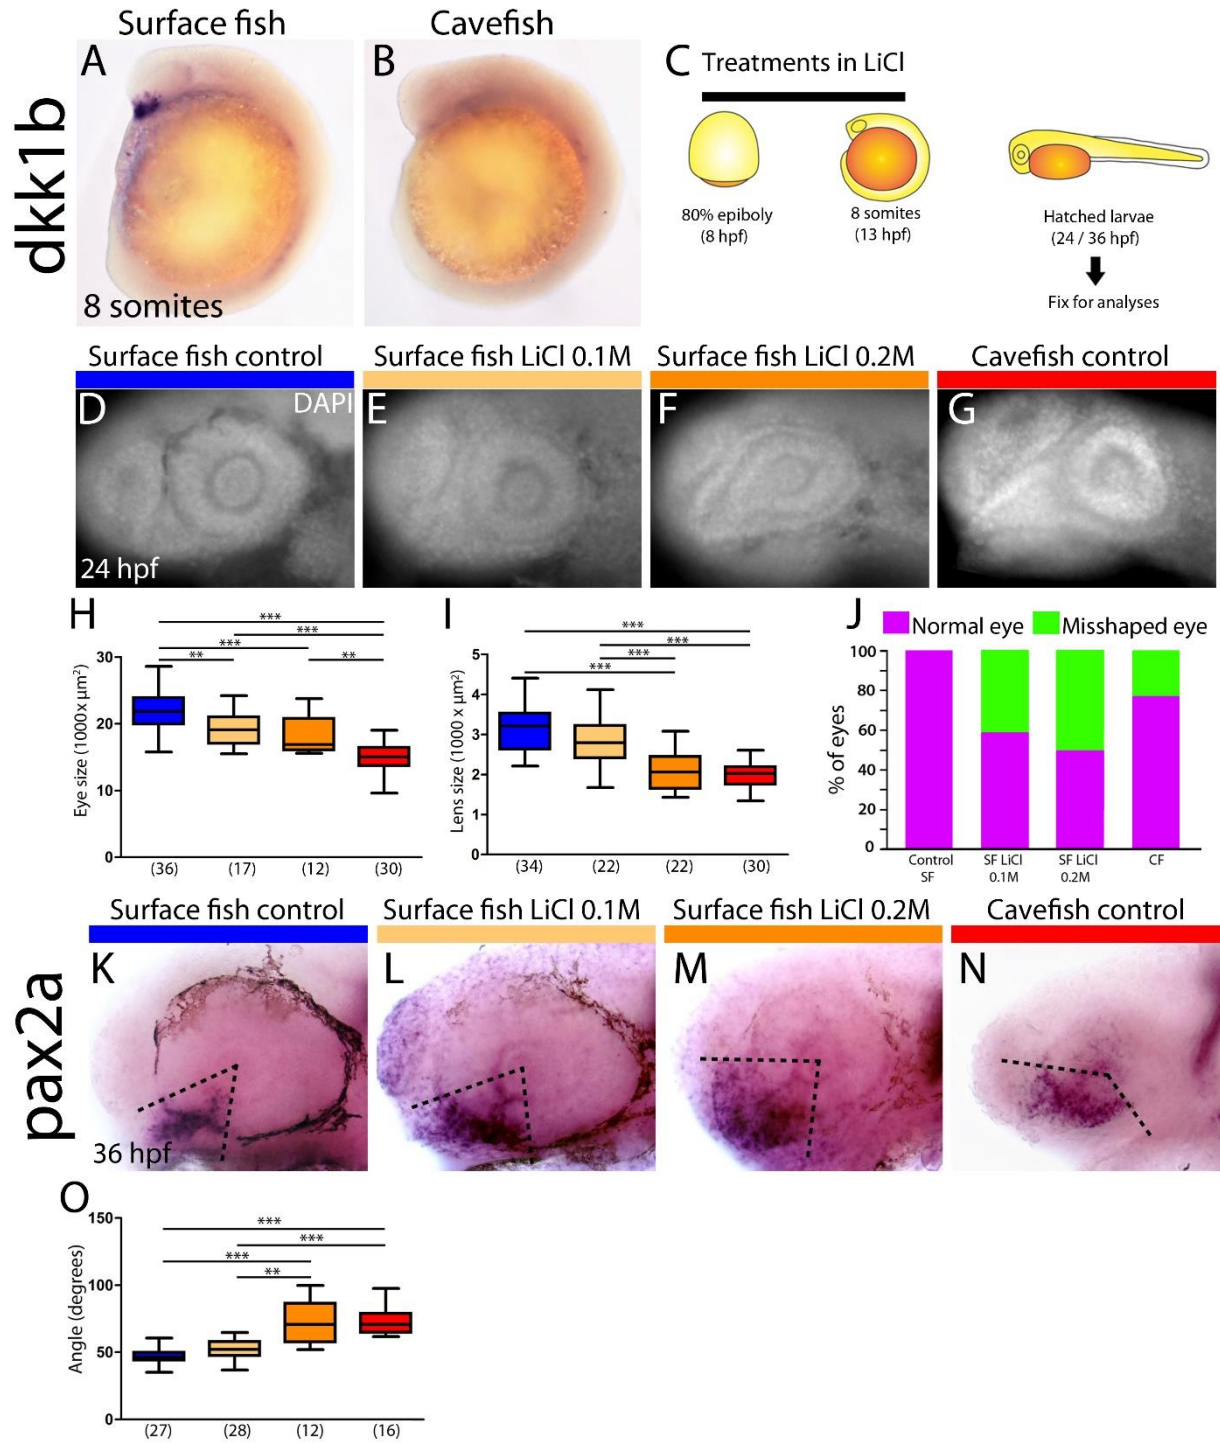

954

955

956

957



958 **Figure 5.- Differential off-set of *dkk1b* expression may be relevant for the optic phenotype in cavefish.**

959 (A-B) Expression of *dkk1b* at 8 somite stage in surface fish (A) and cavefish (B). (C) Experimental design for  
960 LiCl treatments. Dechorionated surface fish embryos were treated in LiCl solutions from the end of  
961 gastrulation (8hpf, left) until mid-somitogenesis (13hpf, center) and then fixed for analyses at larvae stages  
962 (24 or 36hpf, right). (D-J) Effect of LiCl treatments analyzed at 24hpf. (D-E) Surface fish untreated (D),  
963 treated with LiCl 0.1 and 0.2M (E and F, respectively) and cavefish untreated (G), stained with DAPI at  
964 24hpf. Quantification of the eye size (H) lens size (I) and percentage of embryos with misshaped developing  
965 eye (J). (K-O) Effect of LiCl treatments analyzed at 36hpf. Expression of *pax2a* at 36 hpf in the optic  
966 stalk/optic fissure in surface fish untreated (K), treated with LiCl 0.1 and 0.2M (L and M, respectively) and  
967 cavefish untreated (N). Quantification of the angle measured indicated in K-N in black dashed lines.  
968 Kruskal-Wallis tests with Dunn's post-test, were performed.

969

970

971

972

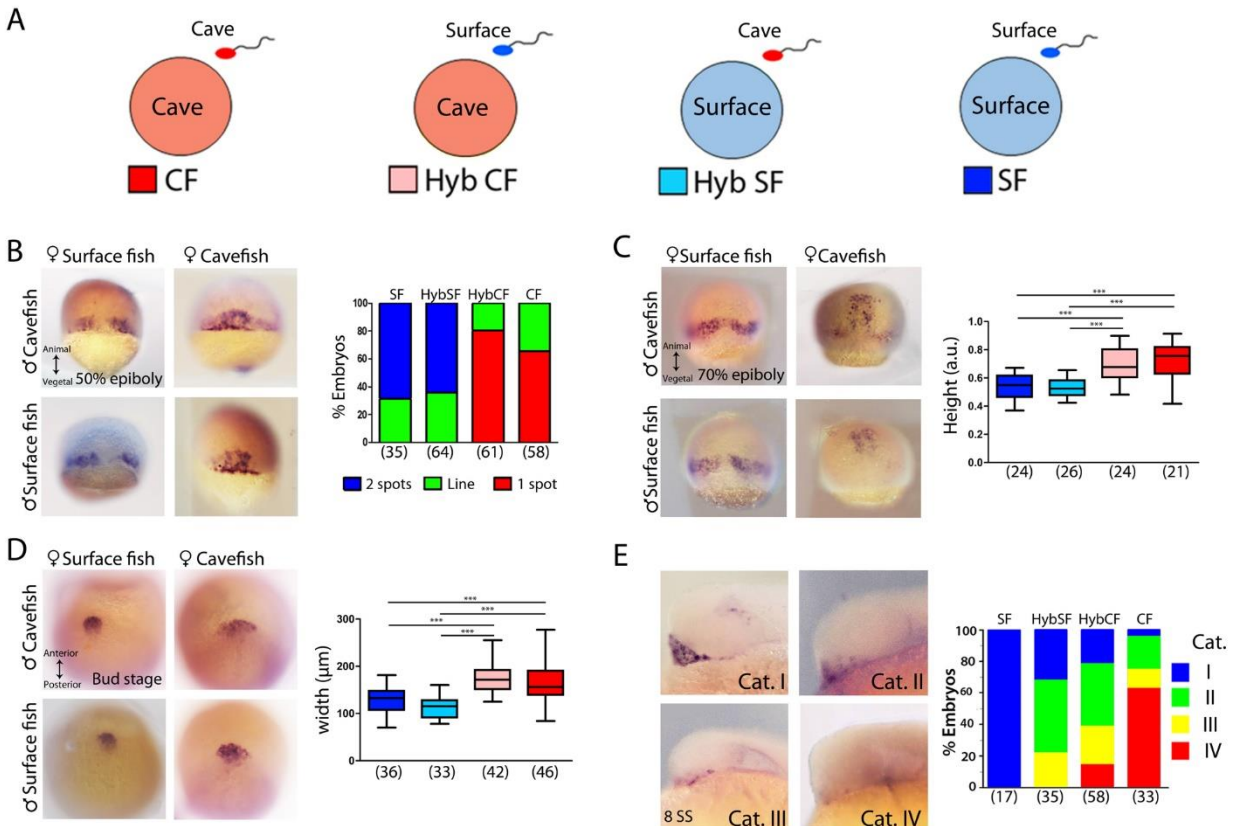

973

974 **Figure 6.- Maternal effect on early development.**

975 Schematic representation of the fertilizations performed for the analyses of maternal effect in F1 hybrids.

976 Oocytes from either morph (cave in pink and surface in light blue) were fertilized with sperm coming from

977 cavefish (red) or surface fish (blue). For simplicity, F1 hybrids were named HybCF (oocyte from cavefish,

978 pink) and HybSF (oocyte from surface fish, light blue), based on their maternal contribution. (B-E)

979 Expression of *dkk1b* at 50% of epiboly (B), 70% of epiboly (C), bud stage (D) and 8 somite stage (E). In the

980 panels B-D are shown HybSF (top left), cavefish (top right), surface fish (bottom left) and HybCF (bottom

981 right). Quantification of the expression pattern of *dkk1b* at 50% epiboly (B, right), classified into three

982 categories: “Two spots” (blue) is the pattern observed in the panel on the left column, “1 spot” (red) is the

983 pattern observed in the panel on the right column, and “Line” is an intermediate profile (not shown). The

984 Y-axis indicates the percentage of the total embryos belonging to each of the categories and the numbers

985 of embryos examined are indicated. Quantification of height in *dkk1b* labeled embryos at 70% epiboly (C,

986 right). Quantification of width of the polster based on *dkk1b* expression (D, right). (E, right) Quantification

987 of the pattern of *dkk1b* at 8 somite stage, where embryos were classified according to the number of

988 positive cells. Category I (blue, in the panel embryo on top left, surface fish), more than 5 cells; category II

989 (green, in the panel embryo on top right, HybSF), between 3 and 5 cells; category III (yellow, on the panel  
990 bottom left, HybCF); and category IV, no positive cells (red, on the panel bottom right, cavefish).

991 All embryos imaged in whole mount, embryos in B and C dorsal view with animal pole upwards, embryos  
992 in D in dorsal view with anterior upwards and embryos in E in lateral view with anterior to the left. Kruskal-  
993 Wallis tests with Dunn's post-test, were performed in all cases.

994

995

996

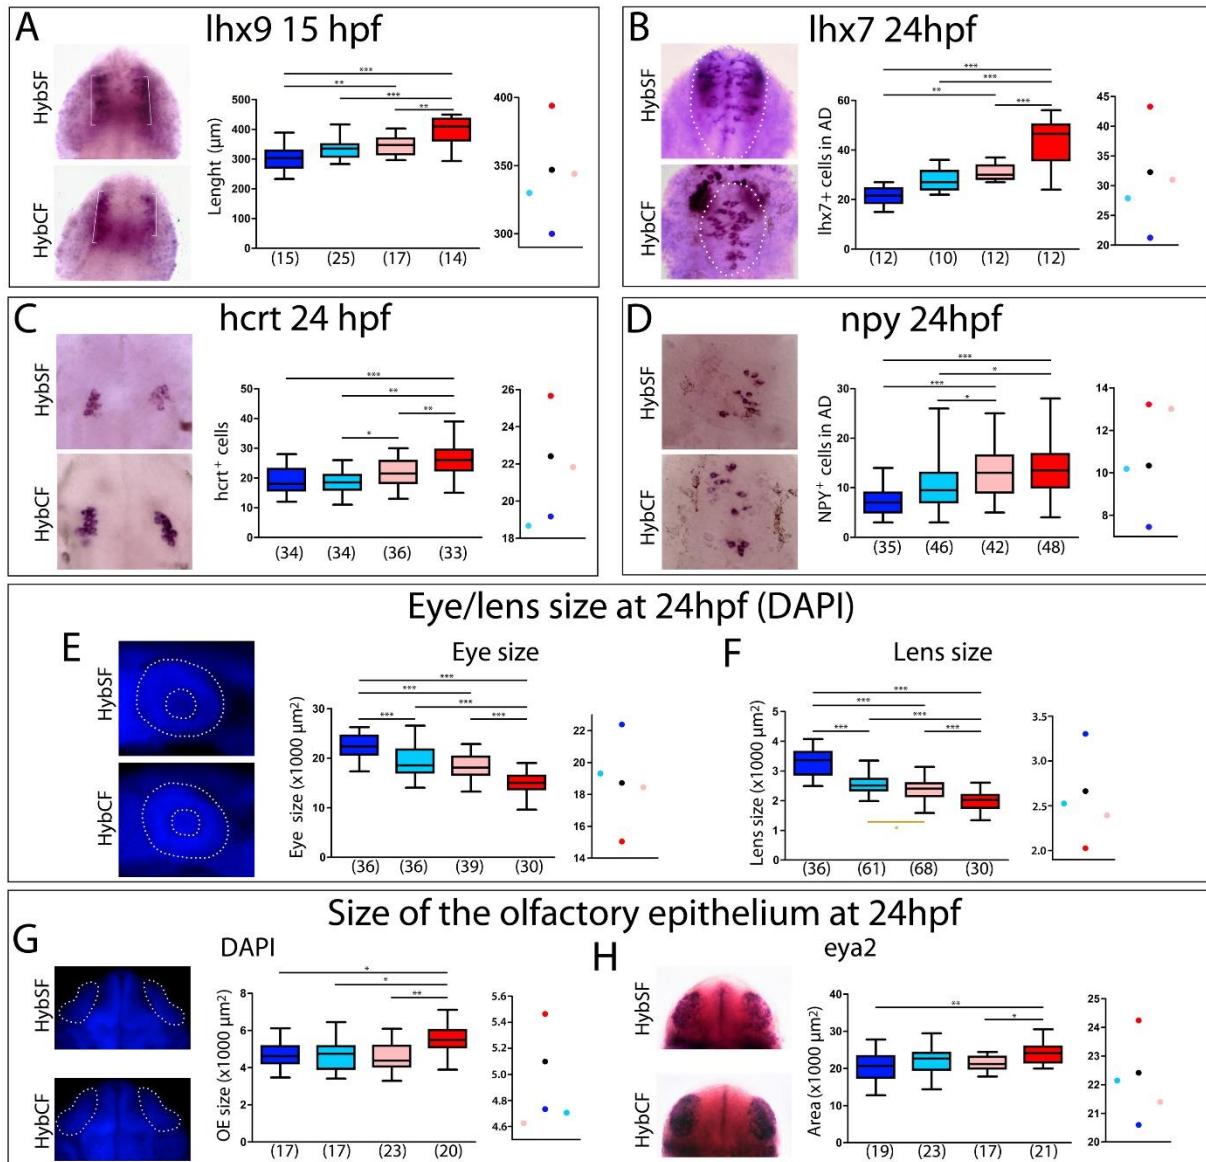

997

998

999 **Figure 7.- Maternal effect on later embryogenesis.**

1000 (A) Expression of *lhx9* in HybSF (left, on top) and HybCF (left, on bottom) at 15 hpf. Quantification of the  
 1001 length of the expression domain in the prospective hypothalamus (white brackets) (center) and the  
 1002 corresponding plot of means distribution (right). (B) Expression of *lhx7* in HybSF (left, on top) and HybCF  
 1003 (left, on bottom) at 24 hpf, with the acroterminal domain indicated in dashed lines. Quantification of the  
 1004 number of *lhx7* expressing cells in the acroterminal domain (center) and the corresponding plot of means  
 1005 distribution (right). (C) Expression of *hcrtr* HybSF (left, on top) and HybCF (left, on bottom) at 24 hpf.

1006 Quantification of the number of hypothalamic *hcrt* expressing cells (center) and the corresponding plot of  
1007 means distribution (right). (D) Expression of *NPY* in HybSF (left, on top) and HybCF (left, on bottom) at 24  
1008 hpf in the acroterminal domain. Quantification of the number of *NPY* expressing cells (center) and the  
1009 corresponding plot of means distribution (right). (E) DAPI stained (left, on top) and HybCF (left, on bottom)  
1010 embryos at 24 hpf. White dashed lines indicate the contour of the eye ball and the lens (exterior and  
1011 interior circles, respectively). Quantification of the size of the Eye ball (center) and the plot of means  
1012 distribution (right). (F) Quantification of the size of the lens (left), and plots of means distribution (right).  
1013 (G) DAPI stained HybSF (left, on top) and HybCF (left, on bottom) embryos at 24 hpf. White dashed lines  
1014 indicate the contour of the olfactory placodes. Quantification of the size of olfactory placodes (center) and  
1015 the corresponding plot of means distribution (right). (H) Expression of *eya2* in HybSF (left, on top) and  
1016 HybCF (left, on bottom) at 24 hpf. Quantification of the size of the *eya2* expression domain in the olfactory  
1017 placodes (center) and the corresponding plot of means distribution (right). Embryos in A-D were dissected  
1018 and mounted in ventral view, anterior upwards. Embryos in E-H are whole mounted embryos in lateral  
1019 view anterior to the left (E); in dorsal view, anterior upwards (G); or in frontal view, dorsal upwards (H).  
1020 Kruskal-Wallis tests with Dunn's post-test, were performed in all cases.

1021

1022

1023

1024

1025

1026

1027

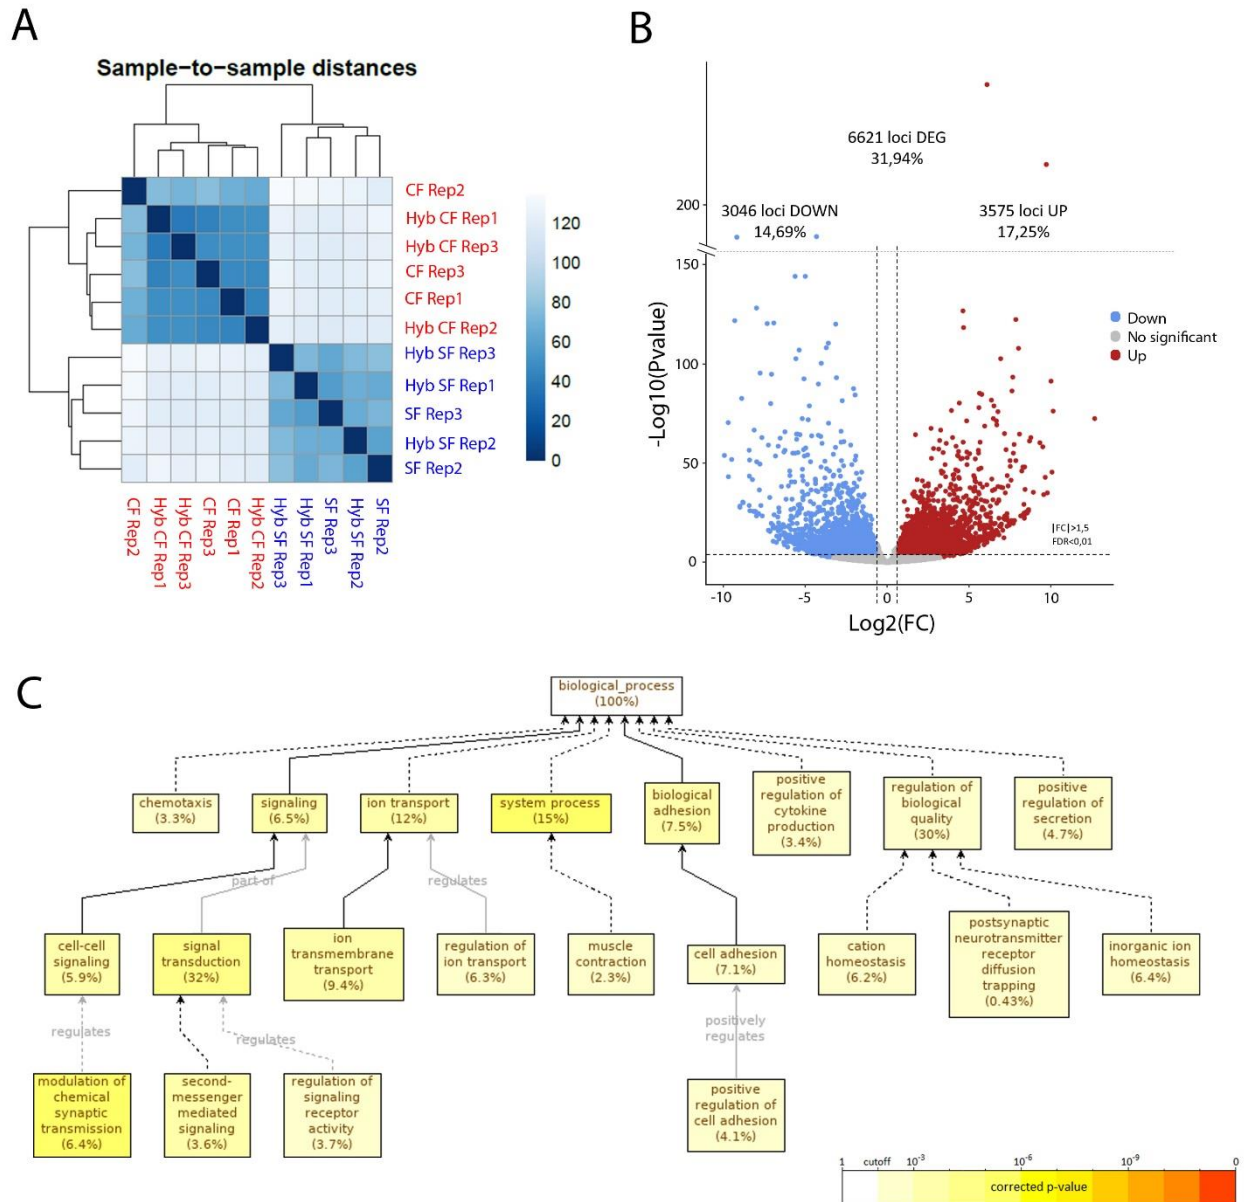

1028  
 1029 **Figure 8.- RNA-sequencing of maternal mRNA of surface fish (SF), cavefish (CF) and reciprocal F1 hybrid**  
 1030 **(HybSF and HybCF, respectively) eggs at 2-cell stage.**

1031 (A) Sample-to-sample distance between all samples. Samples that are similar are close to each other. In  
 1032 the scale, lower numbers (dark blue) indicate closer relationship between samples than higher numbers  
 1033 (light blue/white). (B) Volcano plot of expressed genes at 2-cell stage (n=20730). Genes with an absolute  
 1034 fold change >1.5 and an adjusted p-value (FDR) <0.01 are considered differentially-expressed in cavefish  
 1035 compared to surface fish. Up-regulated genes in cavefish are in red and down-regulated genes in cavefish  
 1036 genes are in blue. (C) Gene ontology enrichment (level: Biological Process) for cavefish DEGs with an

1037 absolute fold change higher than 5. Black lines correspond to “is a” relationship, whereas grey lines  
1038 correspond to the annotated relationship. Full lines correspond to direct relationship and dashed lines to  
1039 indirect relationship (i.e. some nodes are hidden). The color of a node refers to the adjusted p-value (FDR)  
1040 of the enriched GO term and the percentage corresponds to the frequency of the GO term in the studied  
1041 gene set at the level considered. A given gene can have several GO terms. Only enriched GO terms that  
1042 pass the threshold ( $p\text{-value} < 0.01$ ) are displayed on the graph.

1043

1044

1045

1046

1047

1048

1049

1050

1051

1052

1053

1054

1055

1056

1057

1058

1059

1060

1061

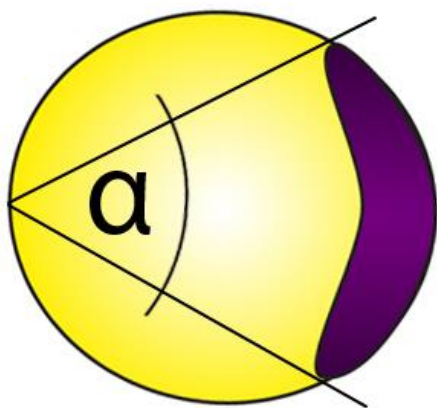

Angle =  $\alpha$

1062

1063

1064 **Figure 1 - figure supplement 1.-** Measurement of angle in embryos stained for *chordin* at 50% of epiboly,

1065 in animal view.

1066

1067

1068

1069

1070

1071

1072

1073

1074



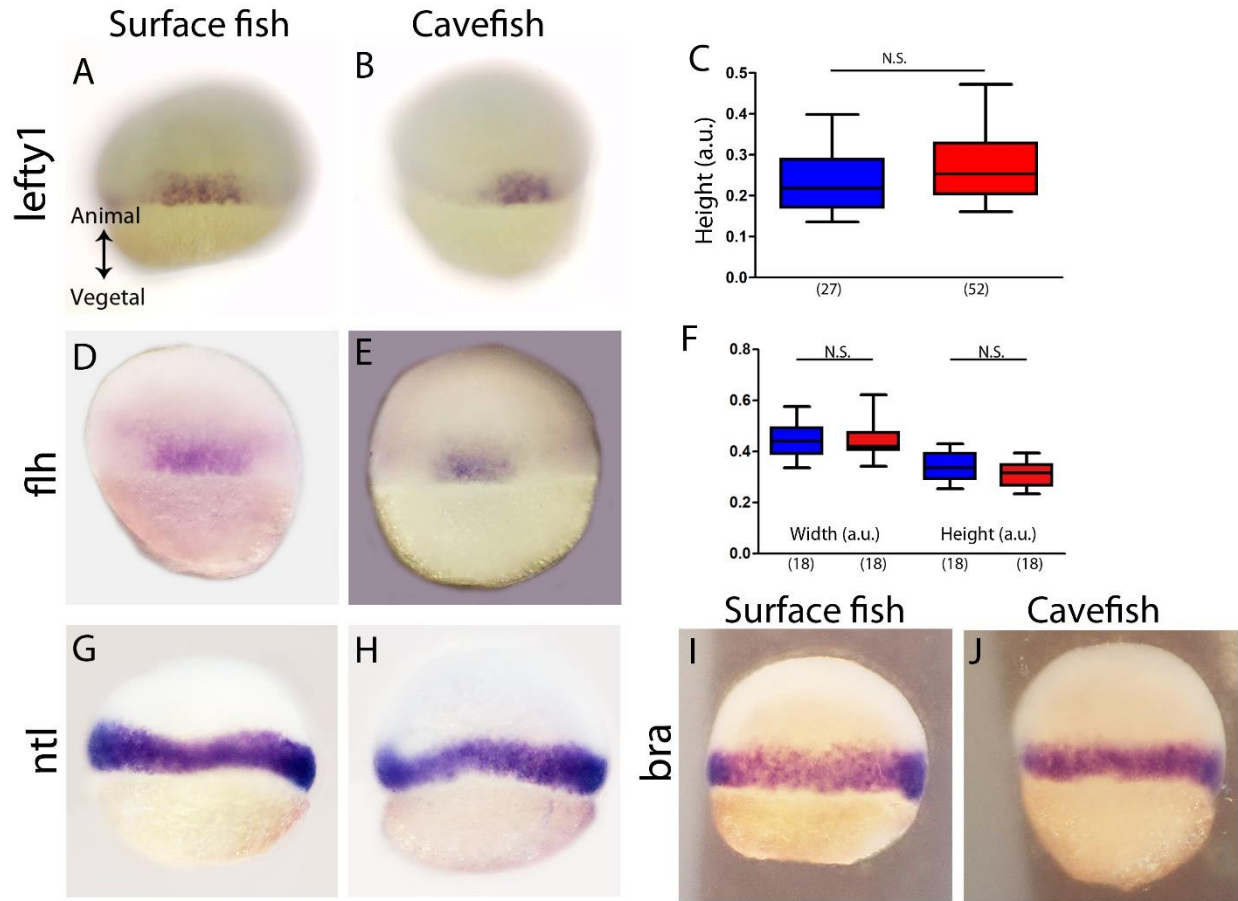

1075

1076 **Figure 1 - figure supplement 2.-** (A-C) Expression of *lefty1* in surface fish (A) and cavefish (B) in dorsal view.

1077 (C) Quantification of the height for *lefty1* expression. (D-F) Expression of *flh* in surface fish (D) and cavefish

1078 (E) in dorsal view. (F) Quantification of the width (left) and the height (right) of *flh* expression. (G-H)

1079 Expression of *ntl* in surface fish (G) and cavefish (H). (I-J) Expression of *bra* in surface fish (I) and cavefish

1080 (J). All embryos in dorsal view, animal pole upwards.

1081

1082

1083

1084

1085

1086

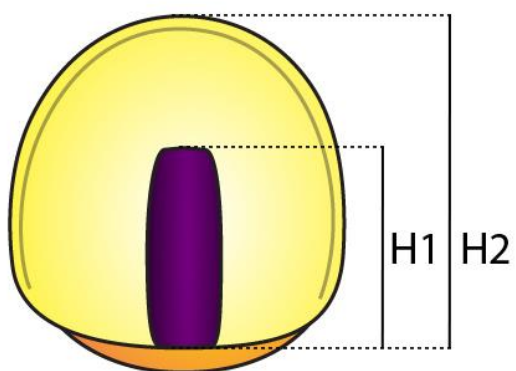

$$\text{Height} = H1/H2$$

1087  
1088 **Figure 2 - figure supplement.-** Measurement of the height, corresponding to the ratio between H1  
1089 (distance from the margin to the leading cell) and H2 (distance from the margin to the animal pole).

1090

1091

1092

1093

1094

1095

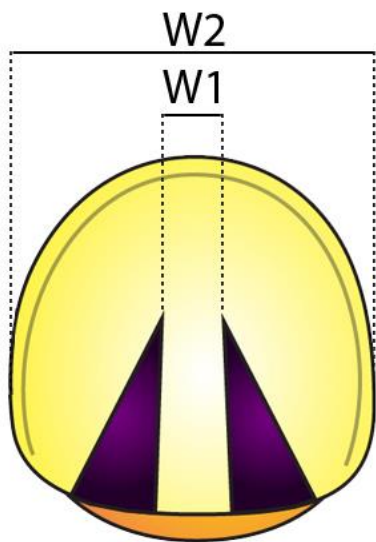

$$\text{Width} = W1/W2$$

1096  
1097 **Figure 3 - figure supplement.-** Measurement of the width, corresponding to the ratio between W1  
1098 (distance of the central gap in this case, or the expression domain) and W2 (the total width of the embryo)

1099

1100

1101

1102

1103

1104

1105

1106

1107

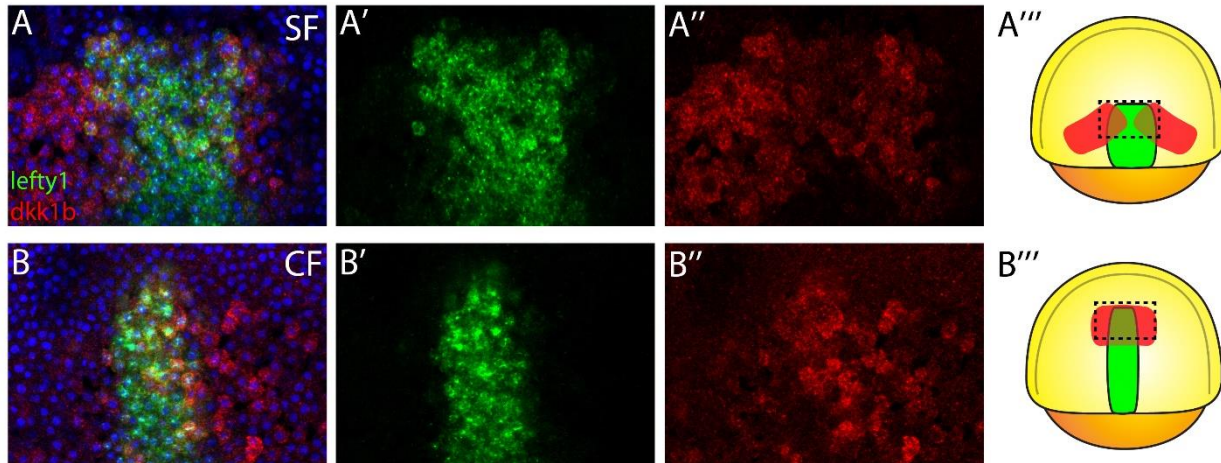

1108  
1109 **Figure 4 - figure supplement 1.-** Expression of *dkk1b* (red) and *lefty1* (green) in surface fish (A) and cavefish  
1110 (B) at 70% of epiboly. Scheme of surface fish (A''') and cavefish (B''') at 70% of epiboly with the region of  
1111 interest indicated in dashed line.

1112

1113

1114

1115

1116

1117

1118

1119

1120

1121

1122

1123

1124

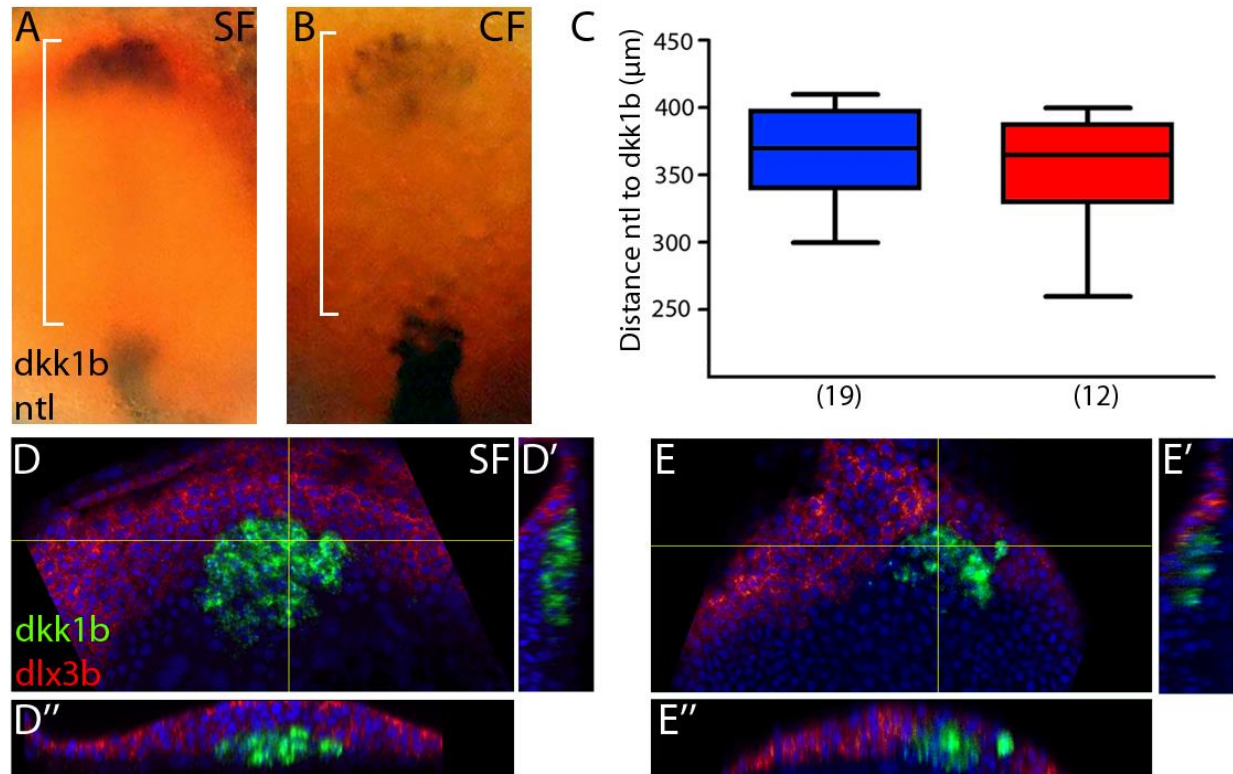

1125

1126 **Figure 4 - figure supplement 2.-** (A-C) Expression of *dkk1b* and *ntl* (notochord) at 10hpf in surface fish (A)  
1127 and cavefish (B). Quantification of the distance from the leading notochordal cell to the leading polster  
1128 cell (C) in a dorsal view, indicated in brackets in A and B. (D-E) Confocal images of the expression of *dkk1b*  
1129 (green) and *dlx3b* (red, neural plate border) at 10hpf in surface fish (D) and cavefish (E). D and E are  
1130 projections of 3µm, D' and E' are reconstructions of sagittal section (yellow line, vertical), and D'' and E''  
1131 are reconstructions from a transverse section (yellow line, horizontal). A and B are whole mounted  
1132 embryos, and D and E are dissected embryos.

1133

1134

1135

1136

1137

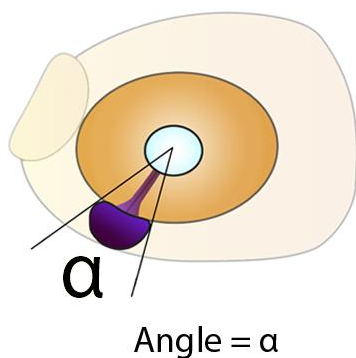

1138

1139

1140 **Figure 5 - figure supplement.-** Measurement of angle in embryos stained for *pax2a* at 36hpf, in lateral  
1141 view.

1142

1143

1144

1145

1146

1147

1148

1149

1150

1151

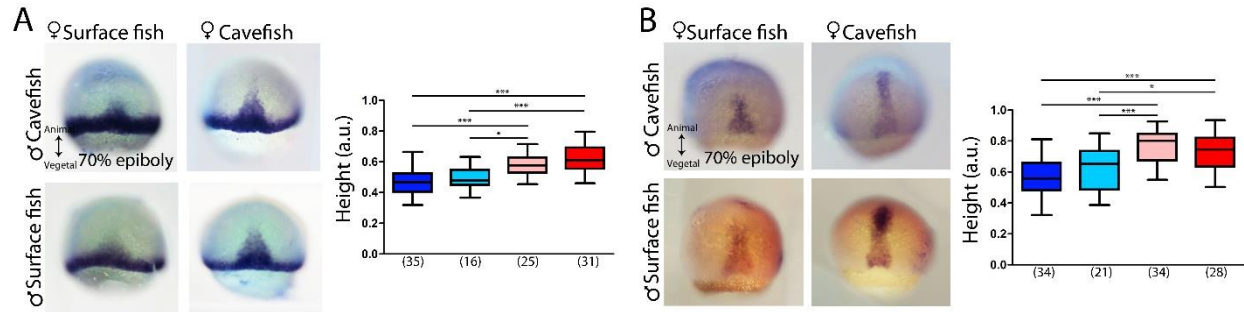

1152

1153 **Figure 6 - figure supplement.-** Expression of *ntl* (A) and *lefty1* (B) at 70% of epiboly (B). In the panels A-B  
1154 are shown HybSF (top left), cavefish (top right), surface fish (bottom left) and HybCF (bottom right).  
1155 Quantification of height in *ntl* (A, right) and *lefty1* (B, right) labeled embryos at 70% epiboly. Color code:  
1156 surface fish, blue; HybSF, light blue; HybCF, pink; and cavefish, red.

1157

1158

1159

1160

1161

1162

1163

1164

1165

1166

1167

1168

1169

1170

1171

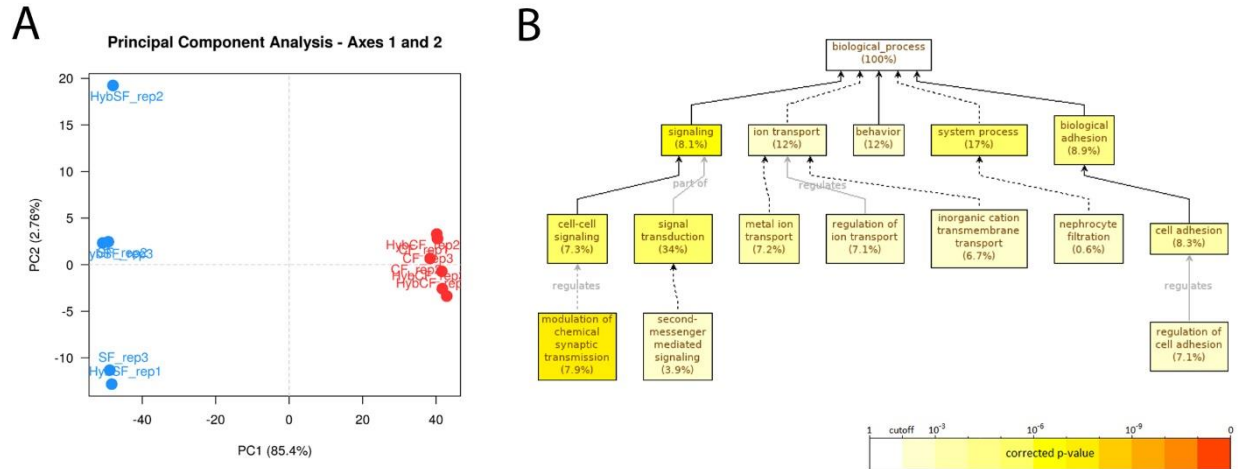

1172

1173 **Figure 8 - figure supplement.-** (A) Principal Component Analysis (PCA) of all the samples for PC1 and PC2.  
 1174 Blue dots correspond to samples coming from a female surface fish and red dots samples coming from  
 1175 female cavefish irrespective of the male morphotype. Note that PC1 and PC2 represent 85.4% and 2.7%  
 1176 of the variation, respectively. (B) Go Enrichment graph for a subset of cavefish up-regulated DEGs, with a  
 1177 fold change higher than 5. Black lines correspond to “is\_a” relationship whereas grey lines correspond to  
 1178 the annotated relationship. Full lines correspond to direct relationship and dashed line to indirect  
 1179 relationship (i.e. some nodes are hidden). The color of a node refers to the adjusted p-value (FDR) of the  
 1180 enriched GO term and the percentage corresponds to the frequency of the GO term in the studied gene  
 1181 set at the level considered. A given gene can have several GO terms. Only enriched GO terms that pass the  
 1182 threshold (p-value<0.01) are displayed on the graph.

1183
